# Supplementary material for: GABAA Receptor Ligands Often Interact with Binding Sites in the Transmembrane Domain and in the Extracellular Domain—Can the Promiscuity Code Be Cracked?
Source: PubMed Central journal article supplement (PMC6982053; doi:10.3390/ijms21010334), 2020-01-03

# **GABA<sub>A</sub> receptor ligands often interact with binding sites in the transmembrane domain and in the extracellular domain – can the promiscuity code be cracked?**

**Maria Teresa Iorio<sup>1</sup>, Florian D. Vogel<sup>2</sup>, Filip Koniuszewski<sup>2</sup>, Petra Scholze<sup>2</sup>, Sabah Rehman<sup>2</sup>, Xenia Simeone<sup>2</sup>, Michael Schnürch<sup>1</sup>, Marko D. Mihovilovic<sup>1</sup> and Margot Ernst<sup>2,\*</sup>**

<sup>1</sup> TU Wien, Institute of Applied Synthetic Chemistry, Getreidemarkt 9/163-OC, 1060, Vienna, Austria;

<sup>2</sup> Medical University of Vienna, Center for Brain Research Spitalgasse 4, 1090 Vienna, Austria;

## **Supporting information**

**<sup>1</sup>H NMR and <sup>13</sup>C NMR Spectrums of Novel Characterized Compounds**

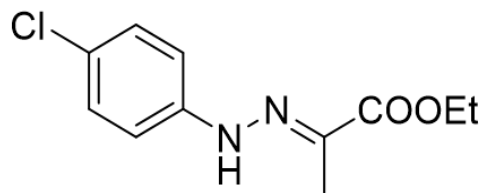

2

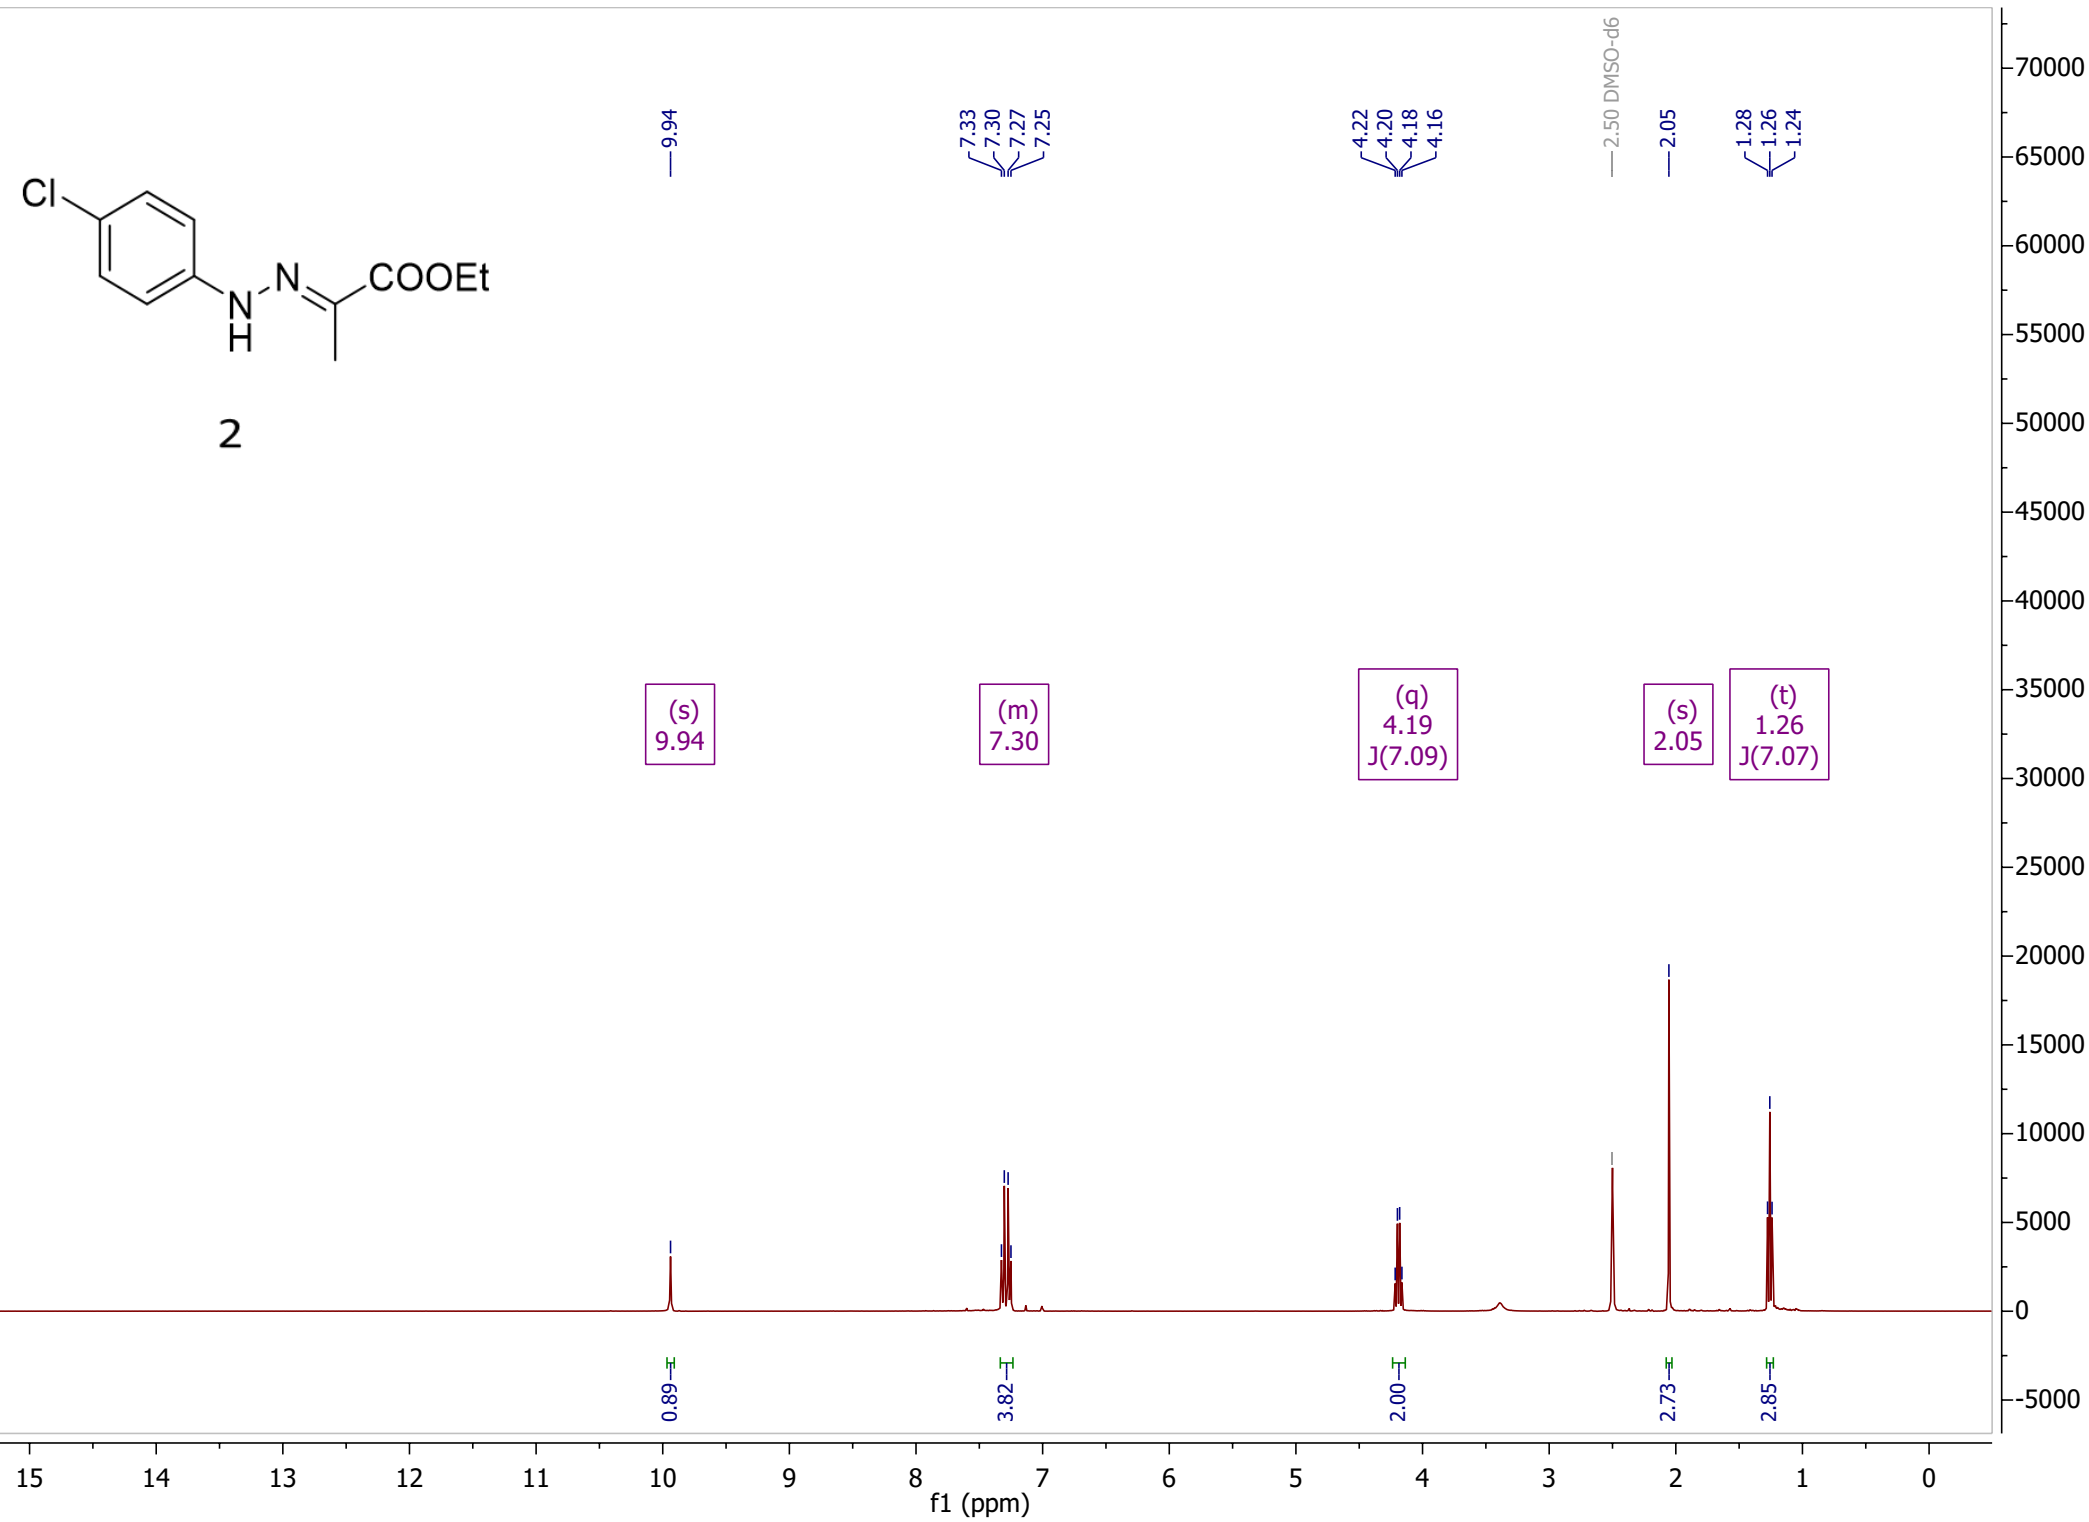

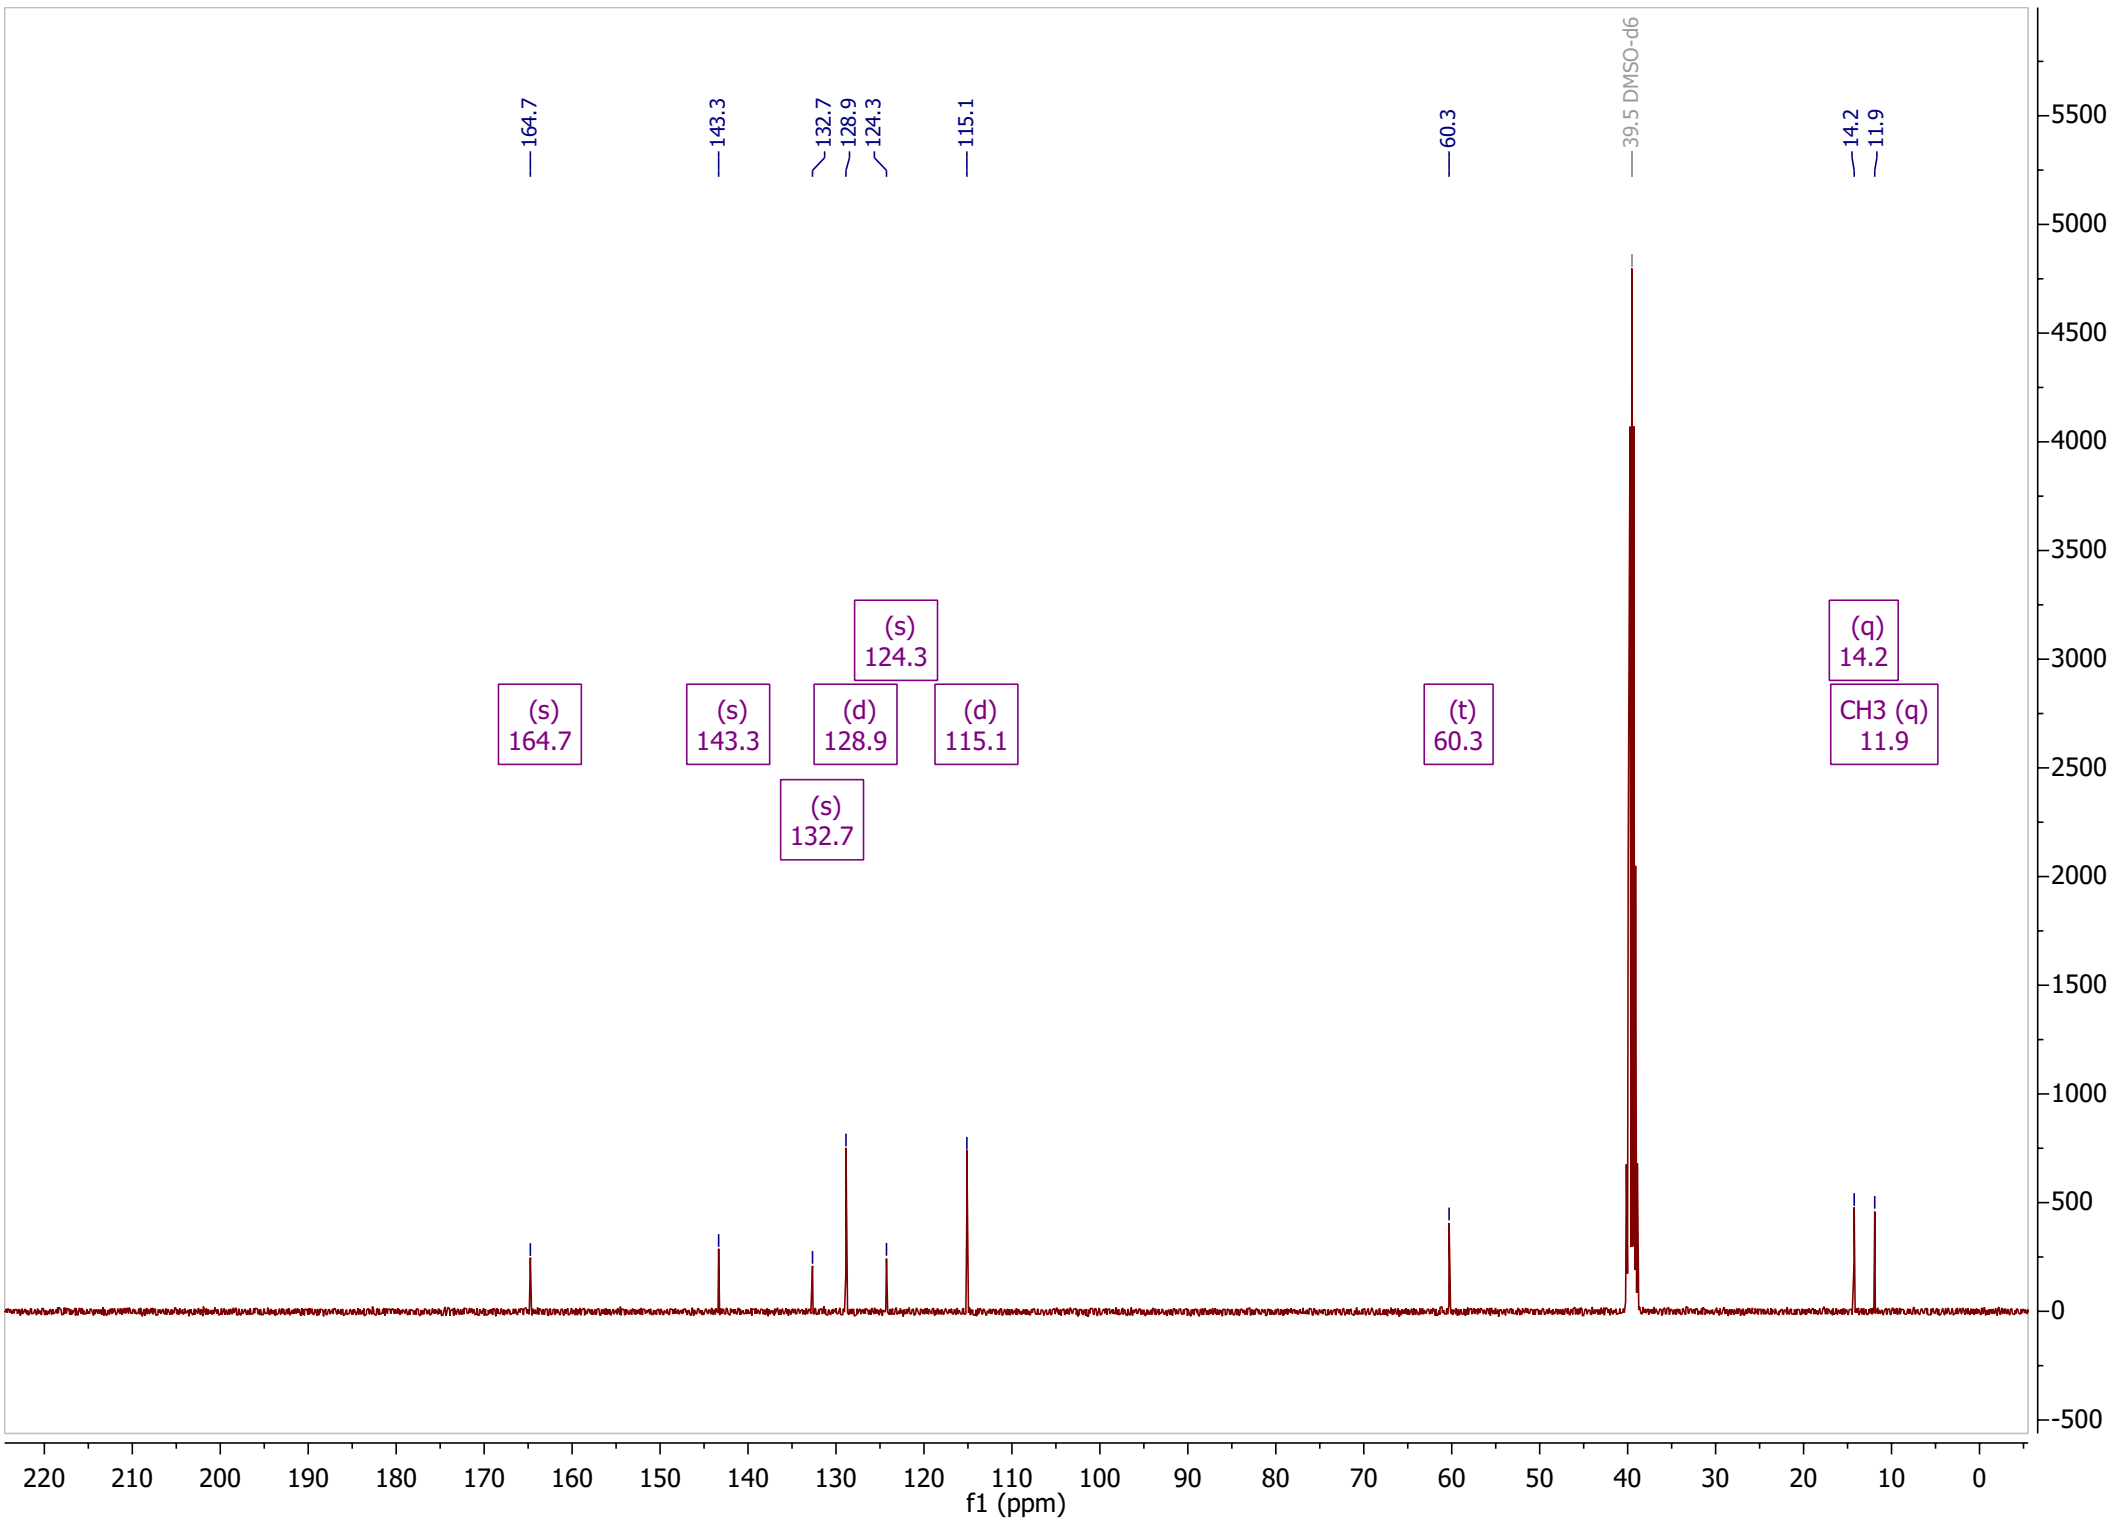

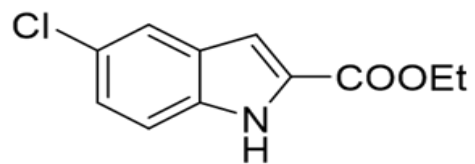

3

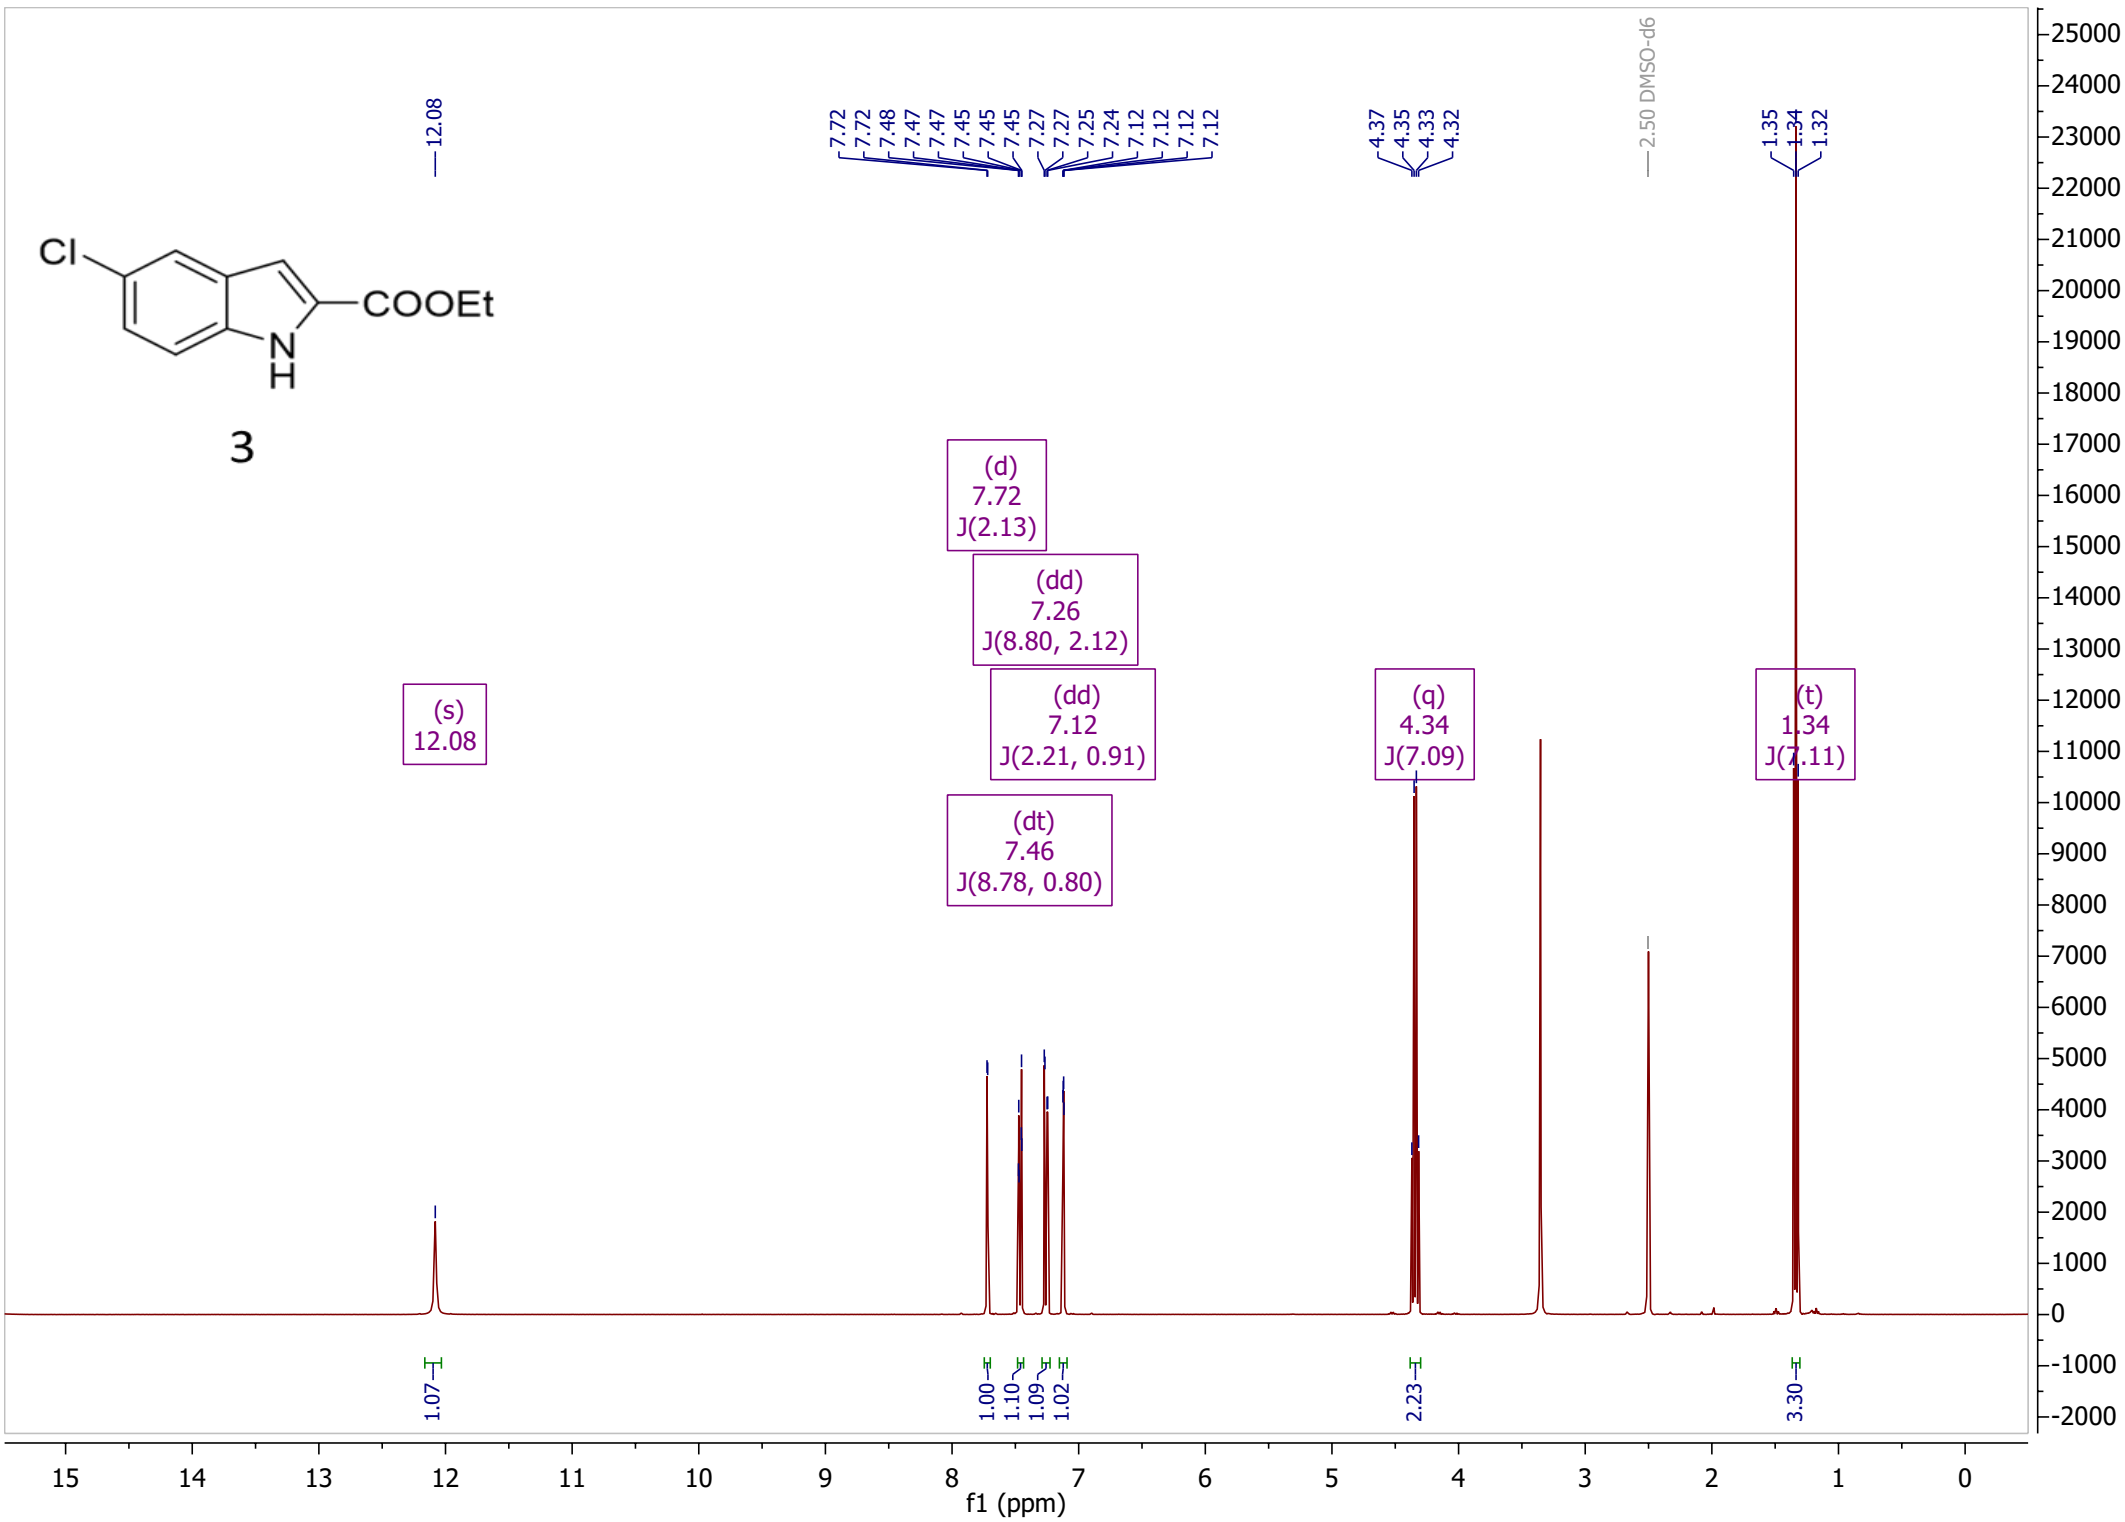

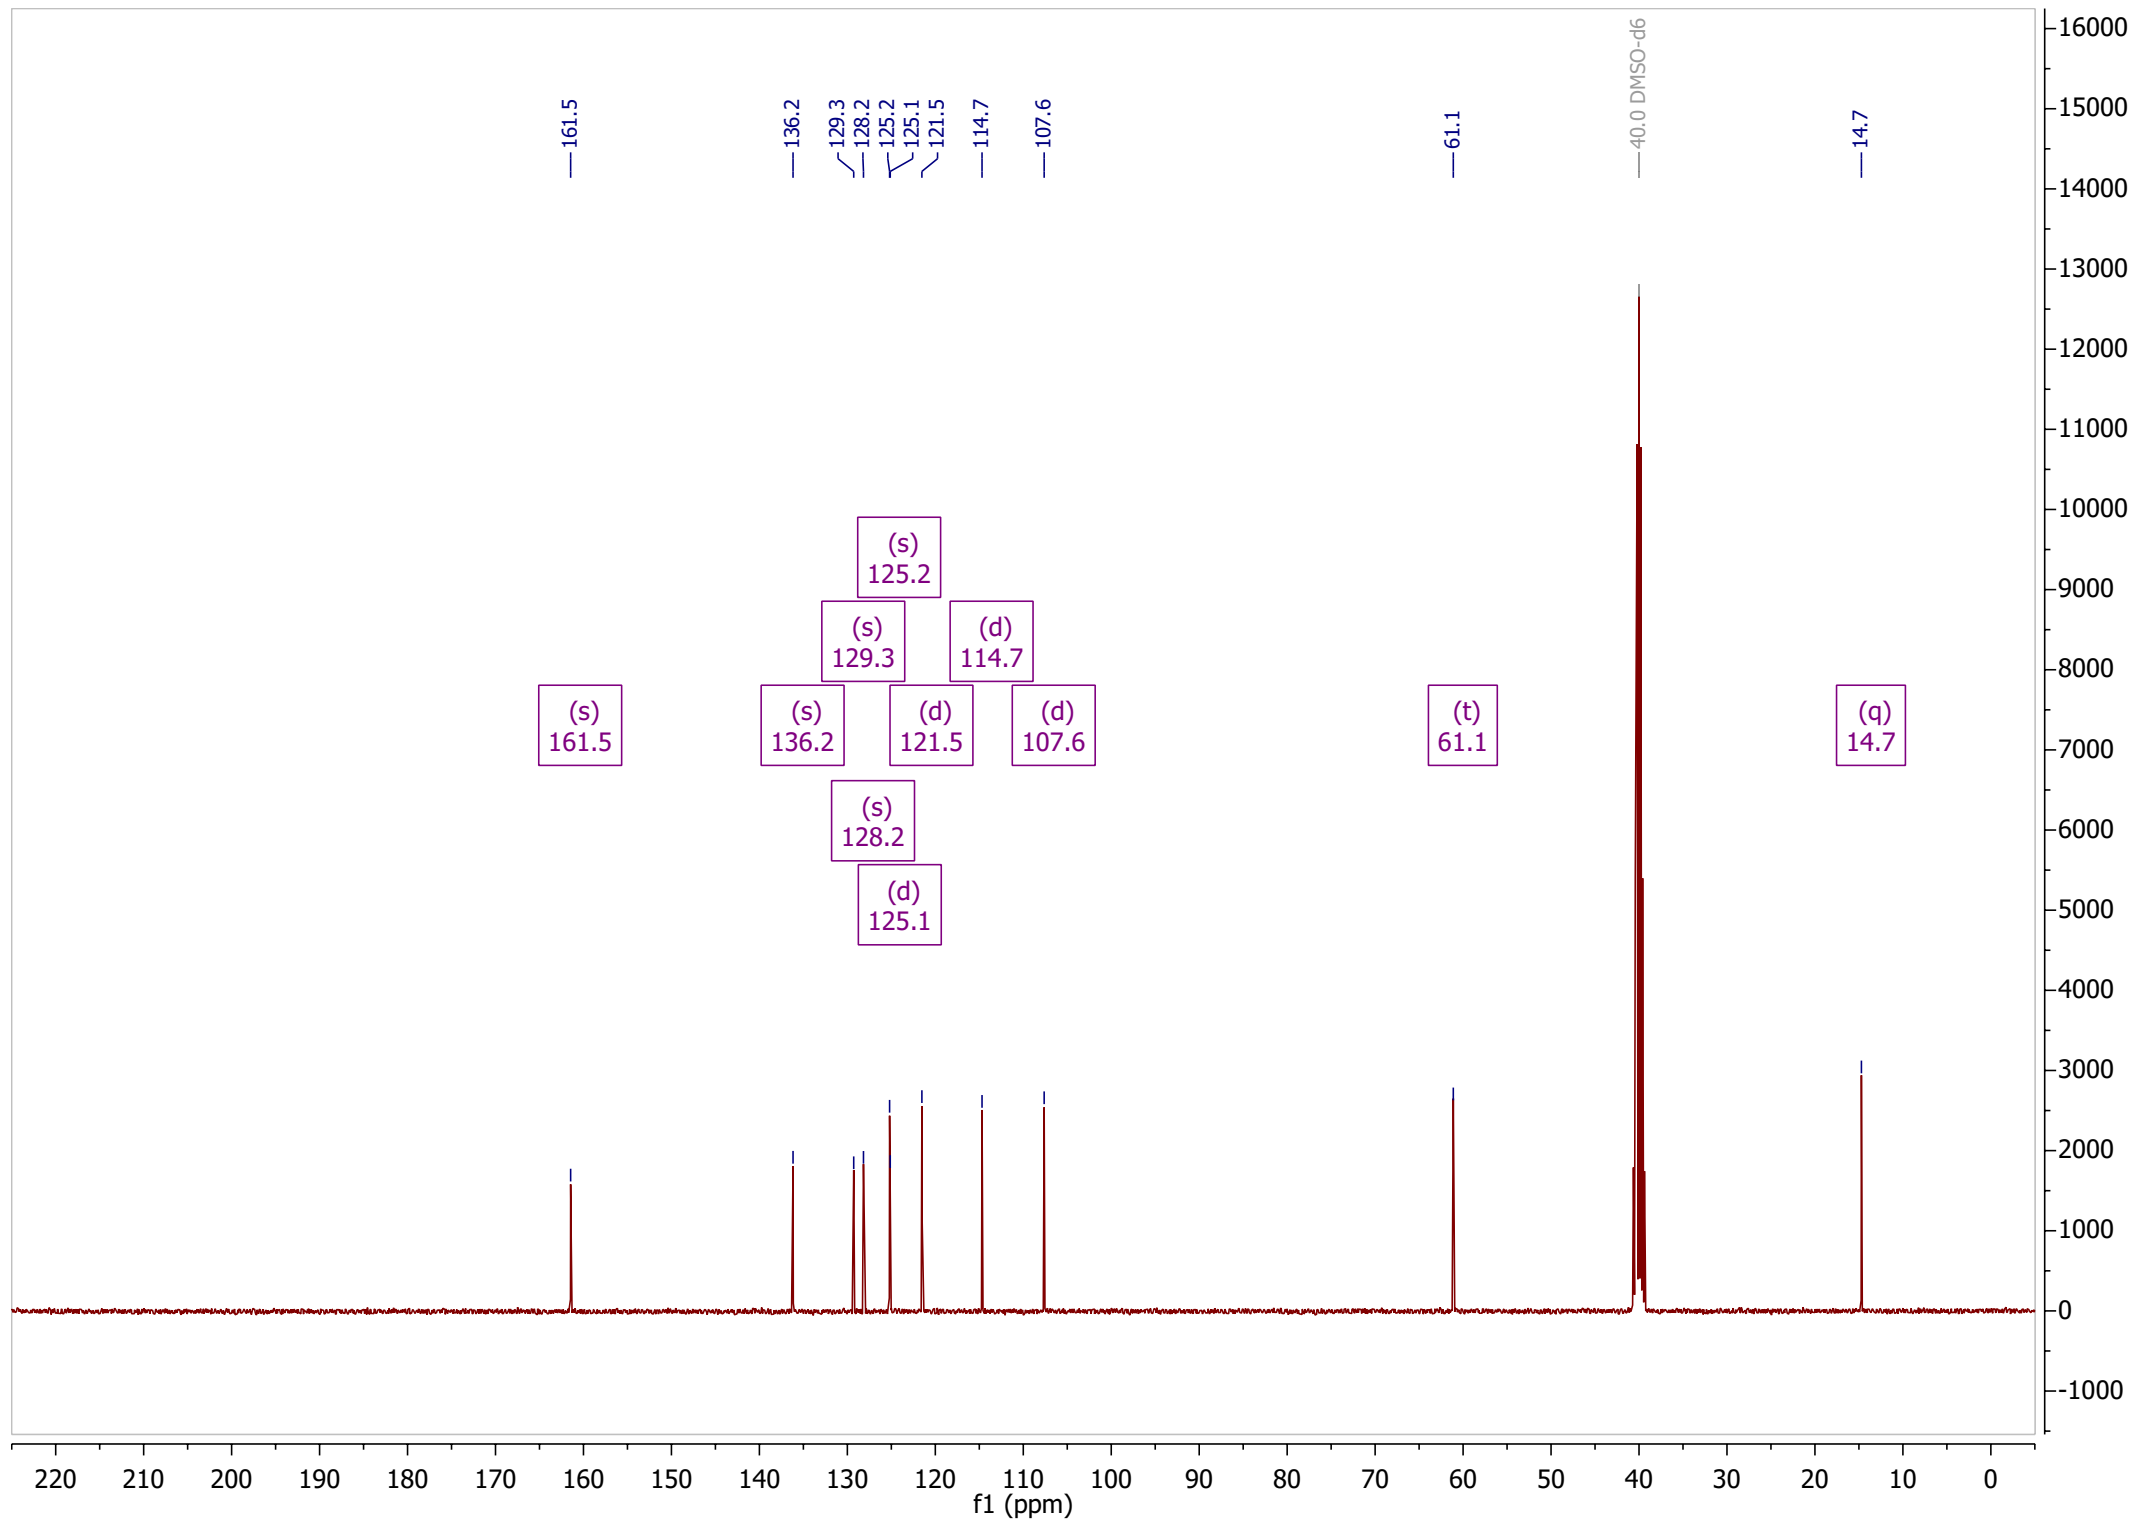

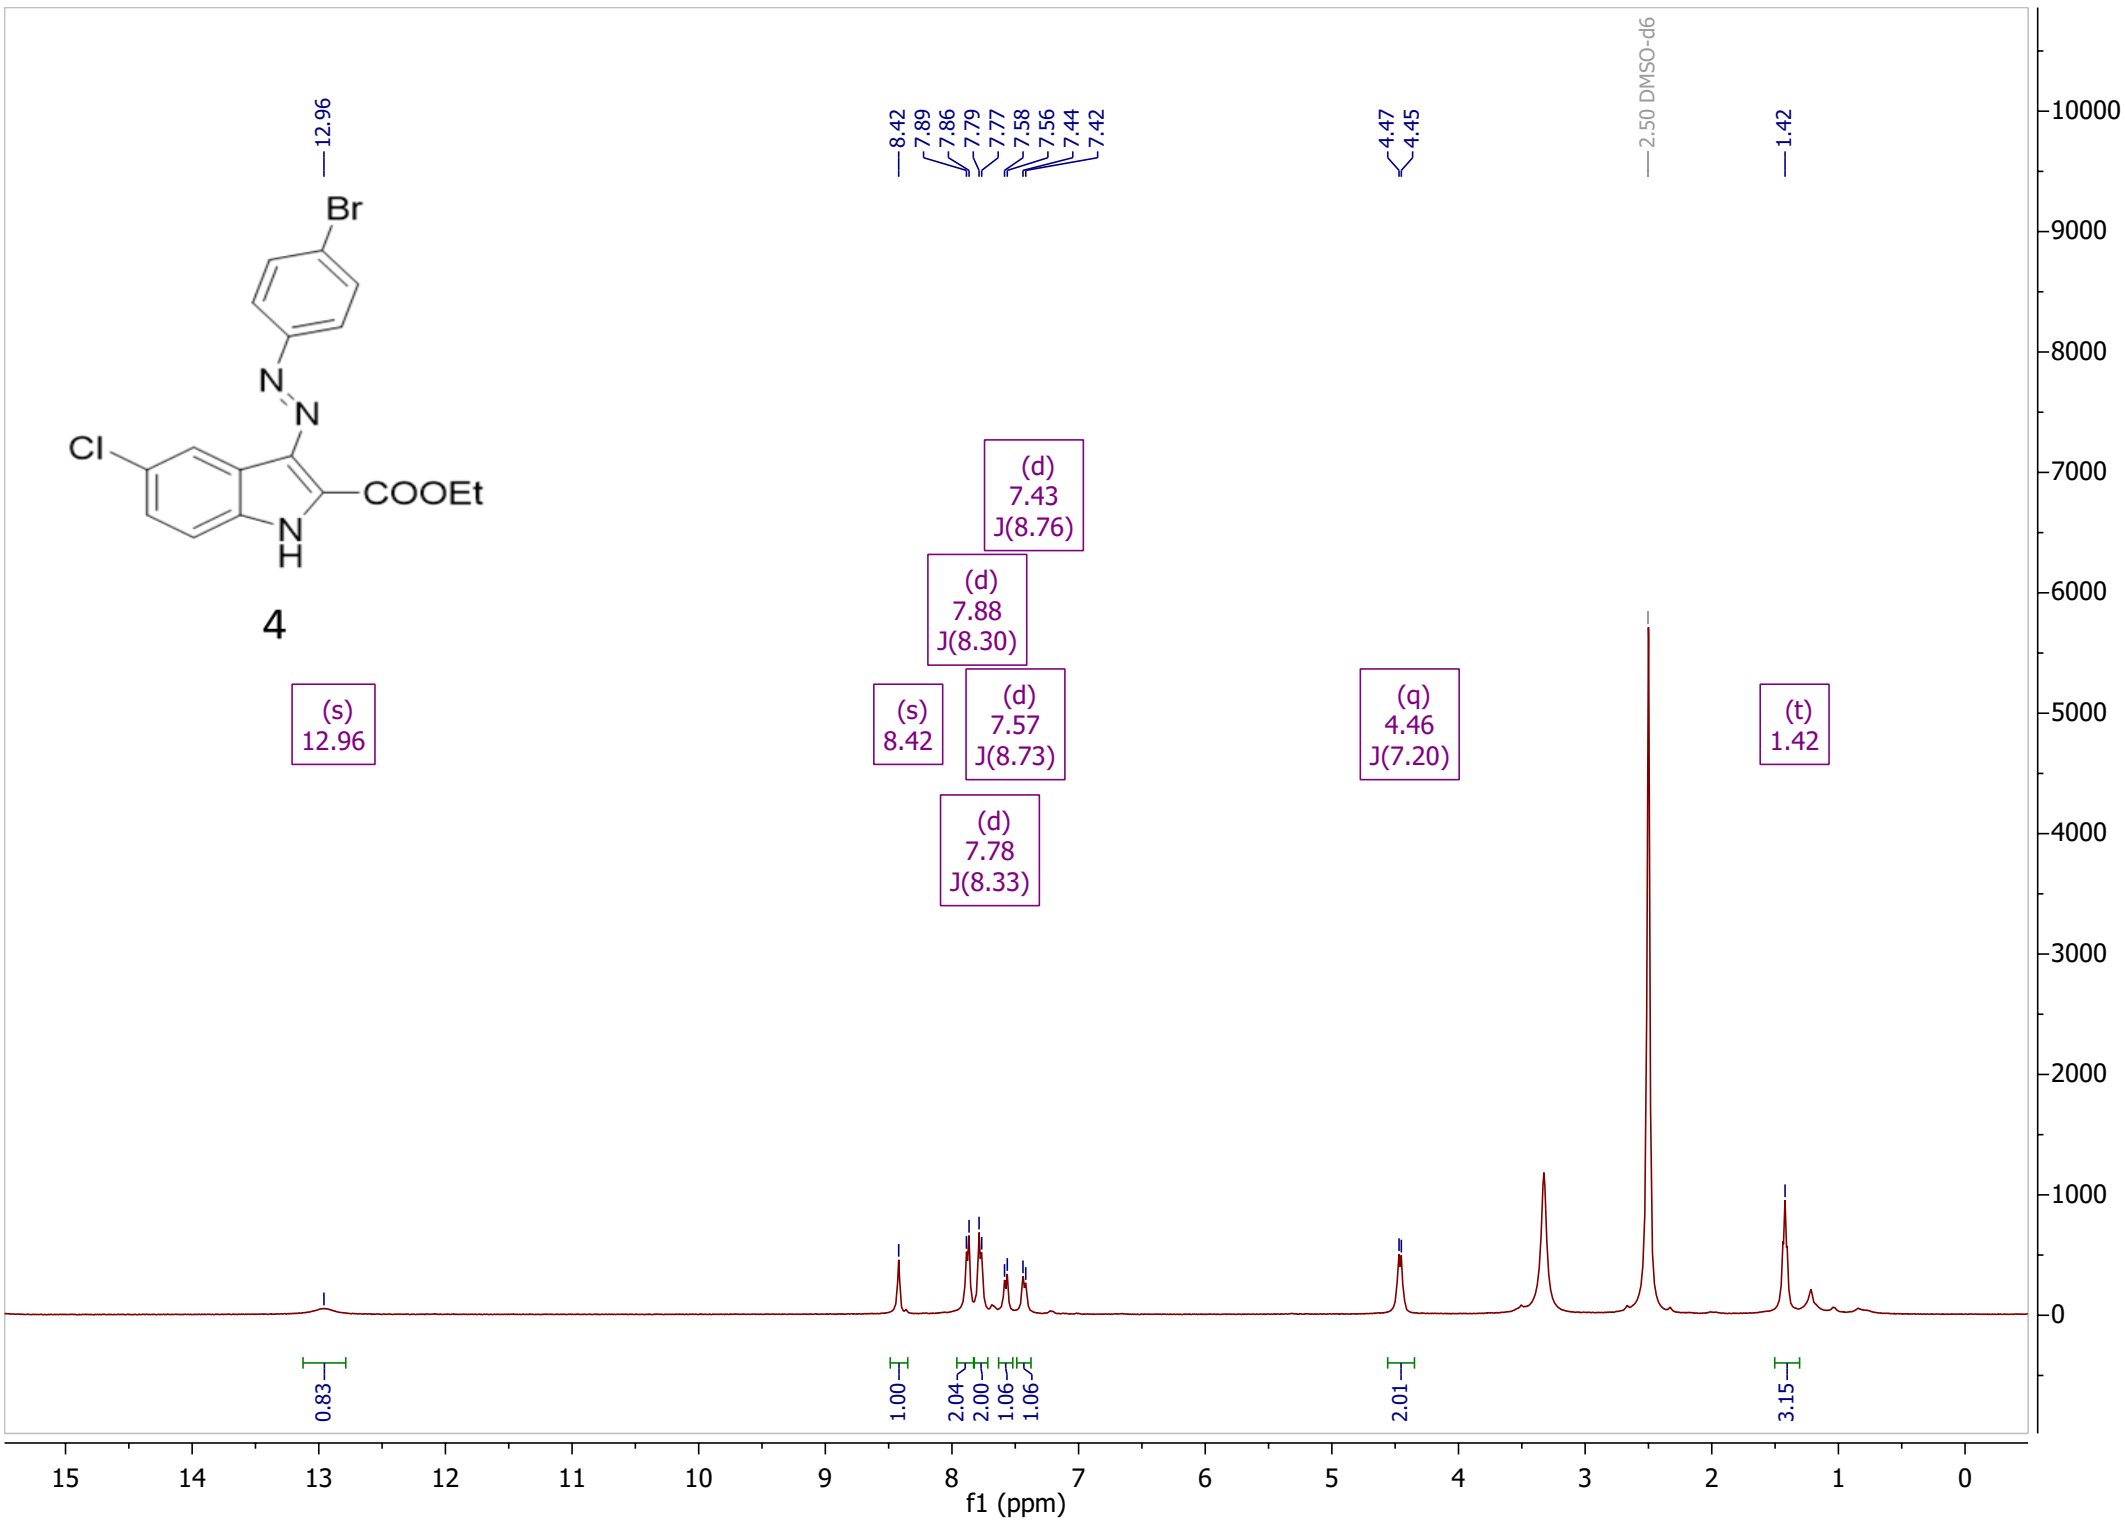

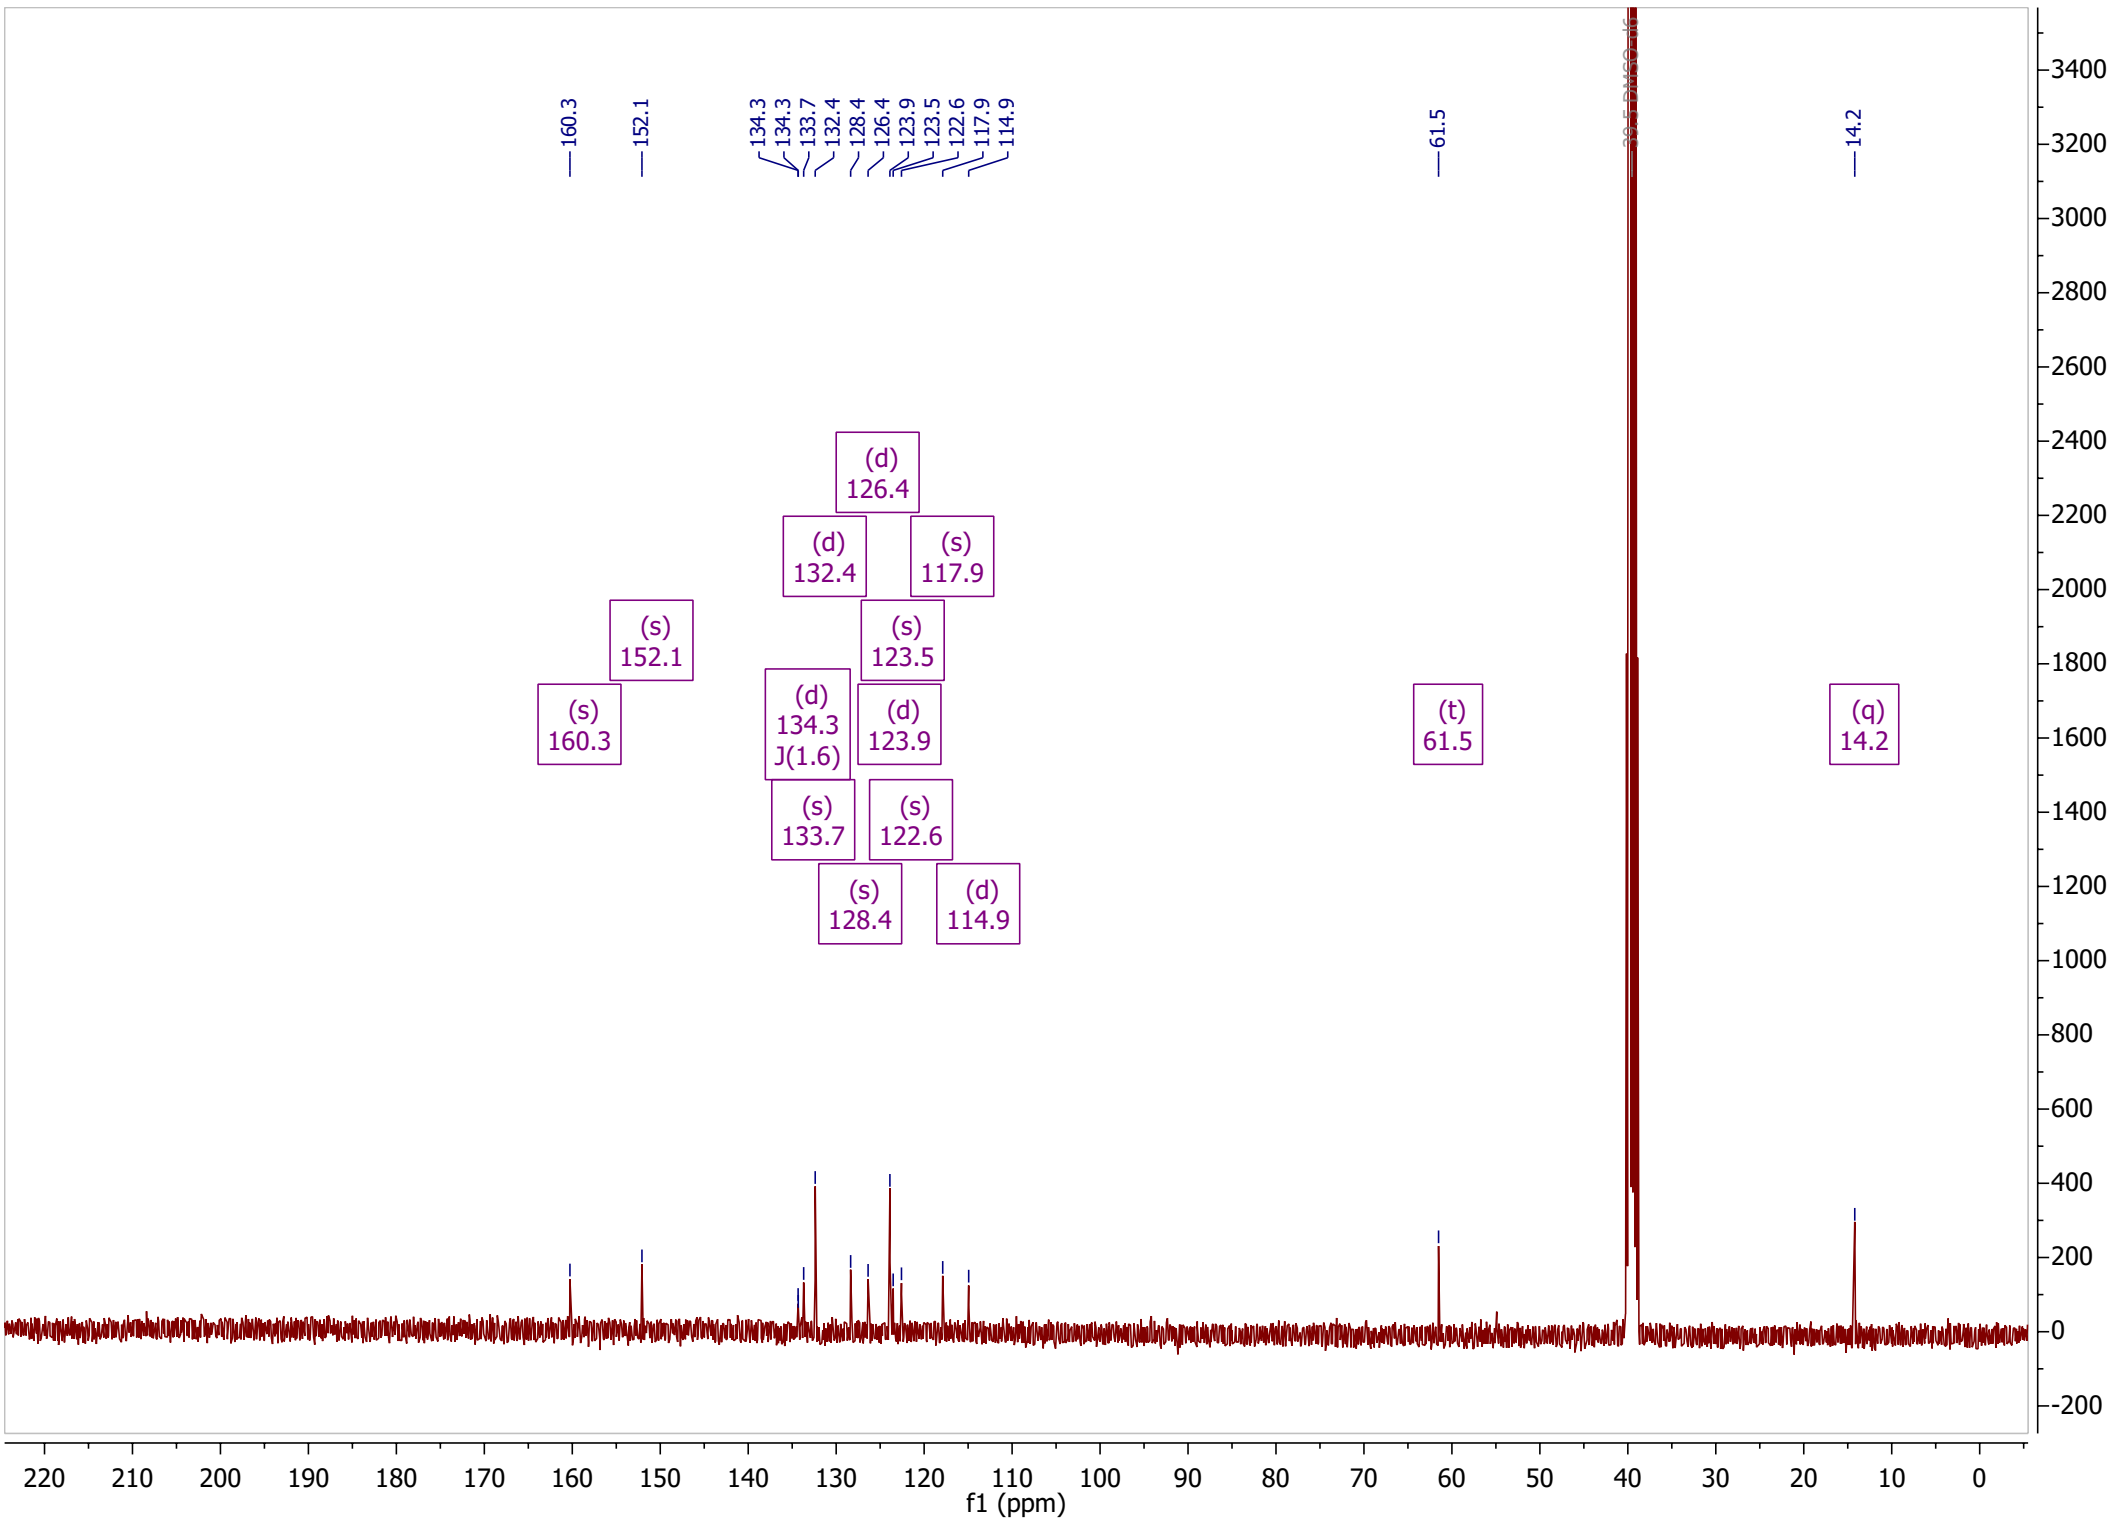

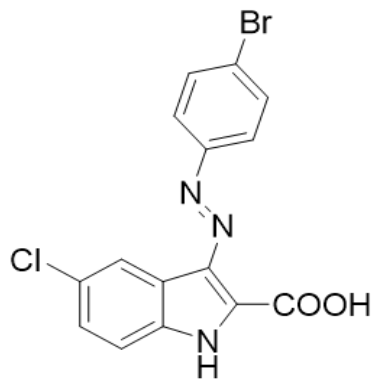

MTI163

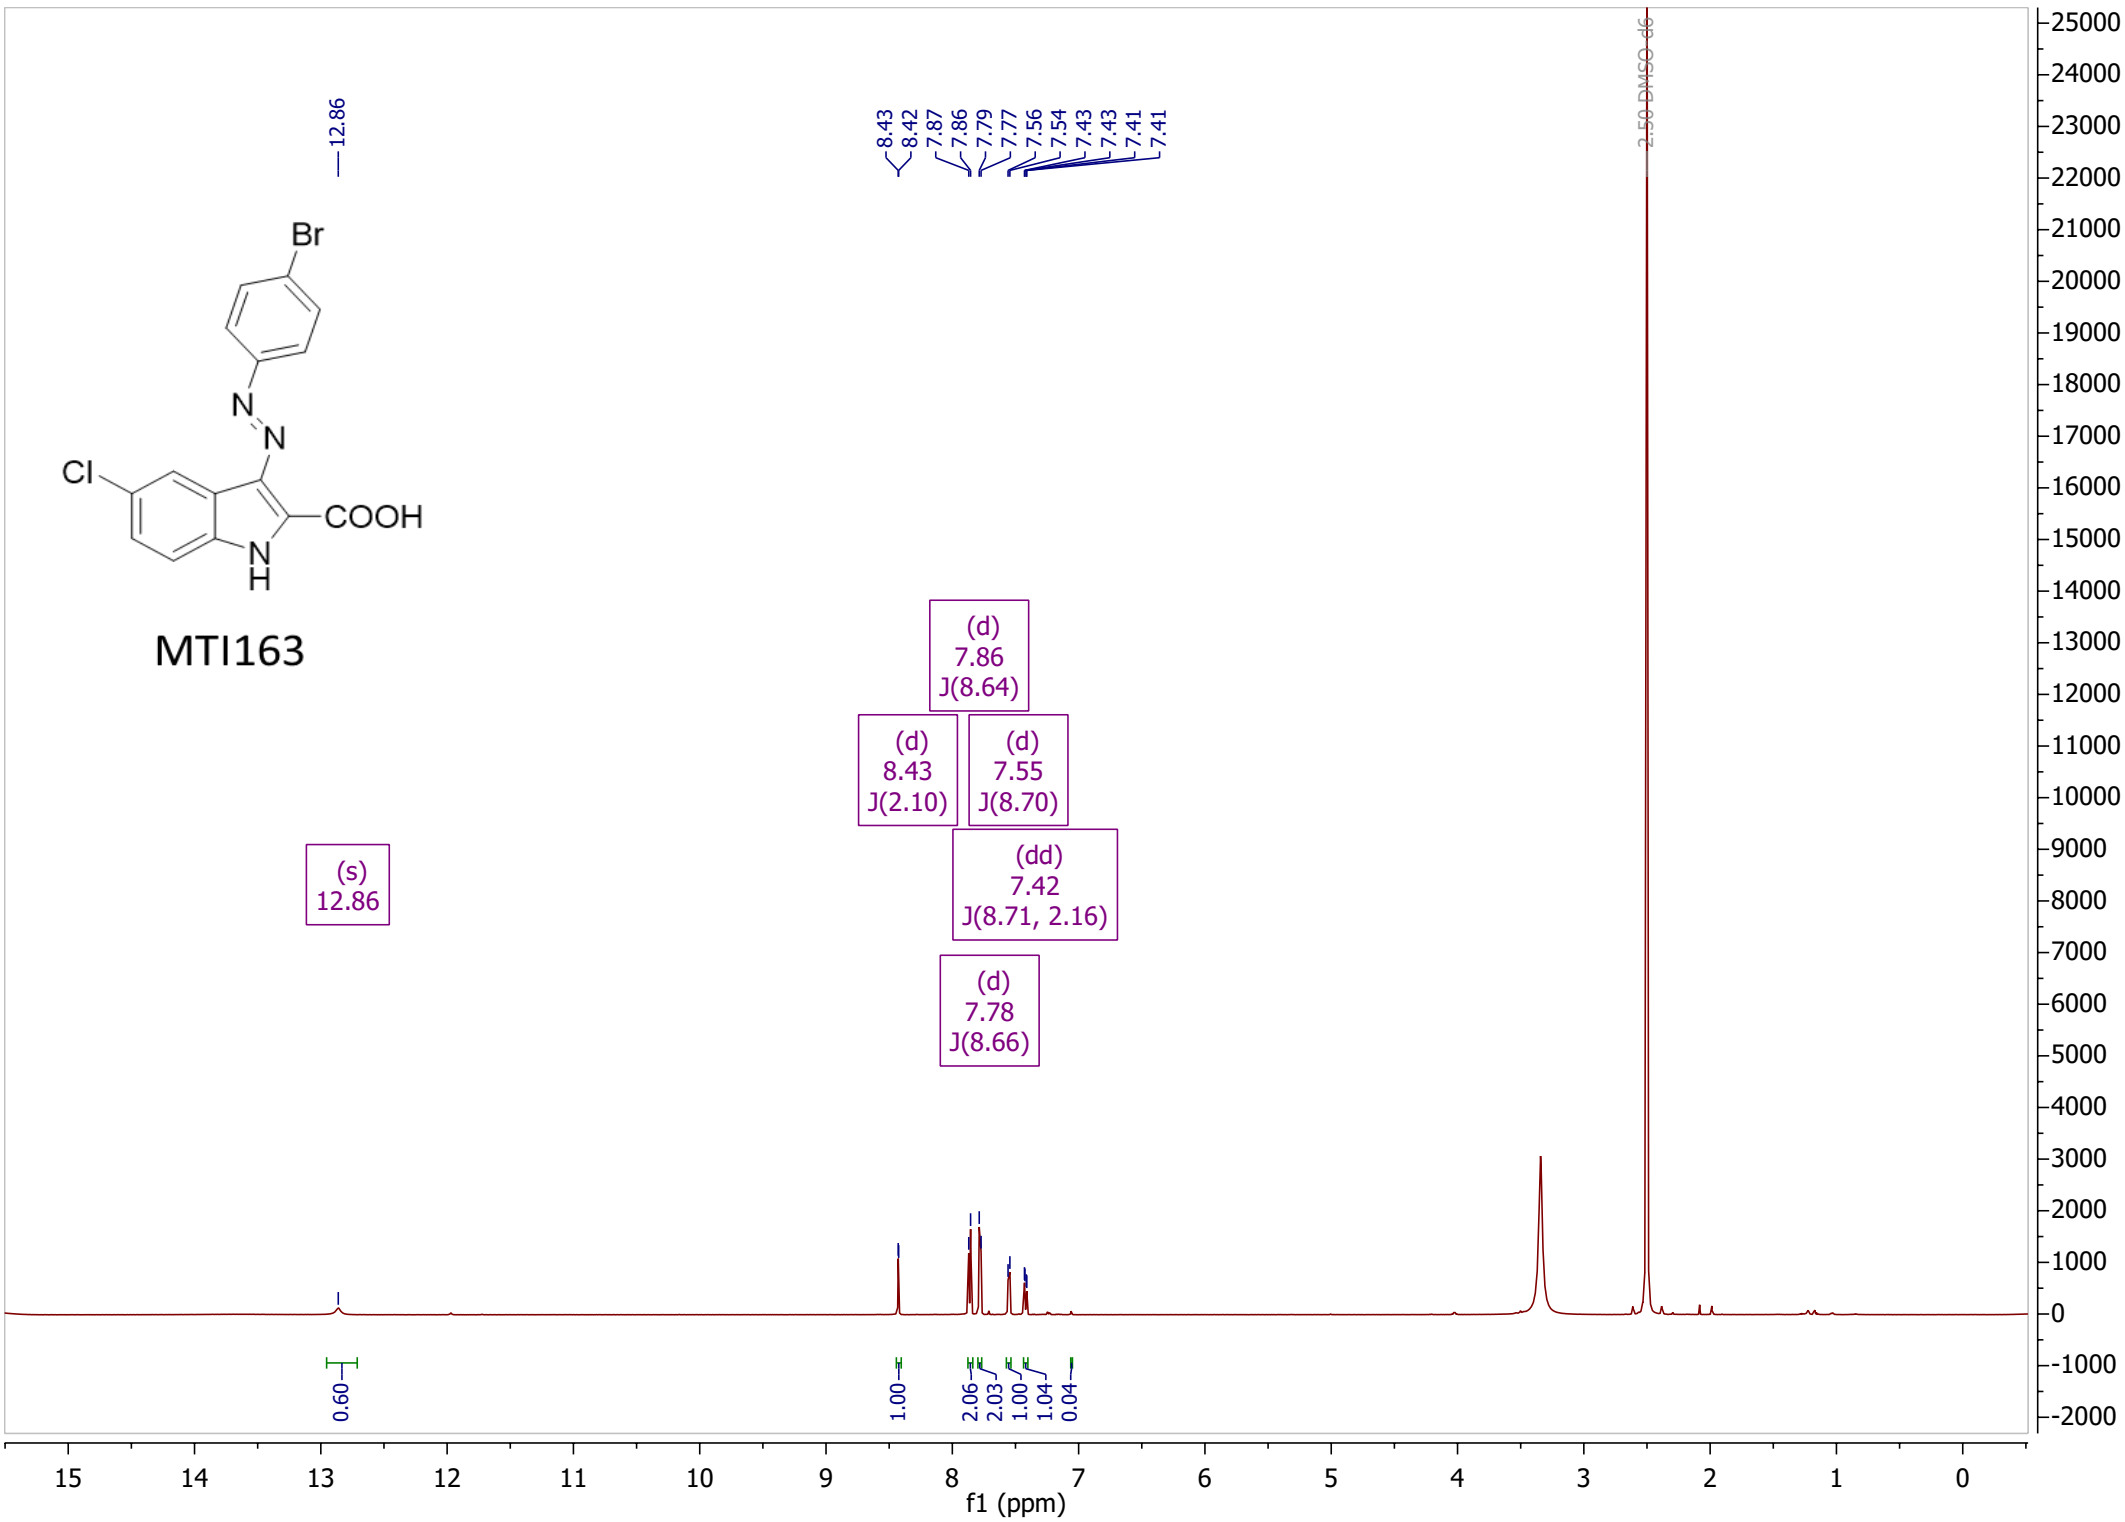



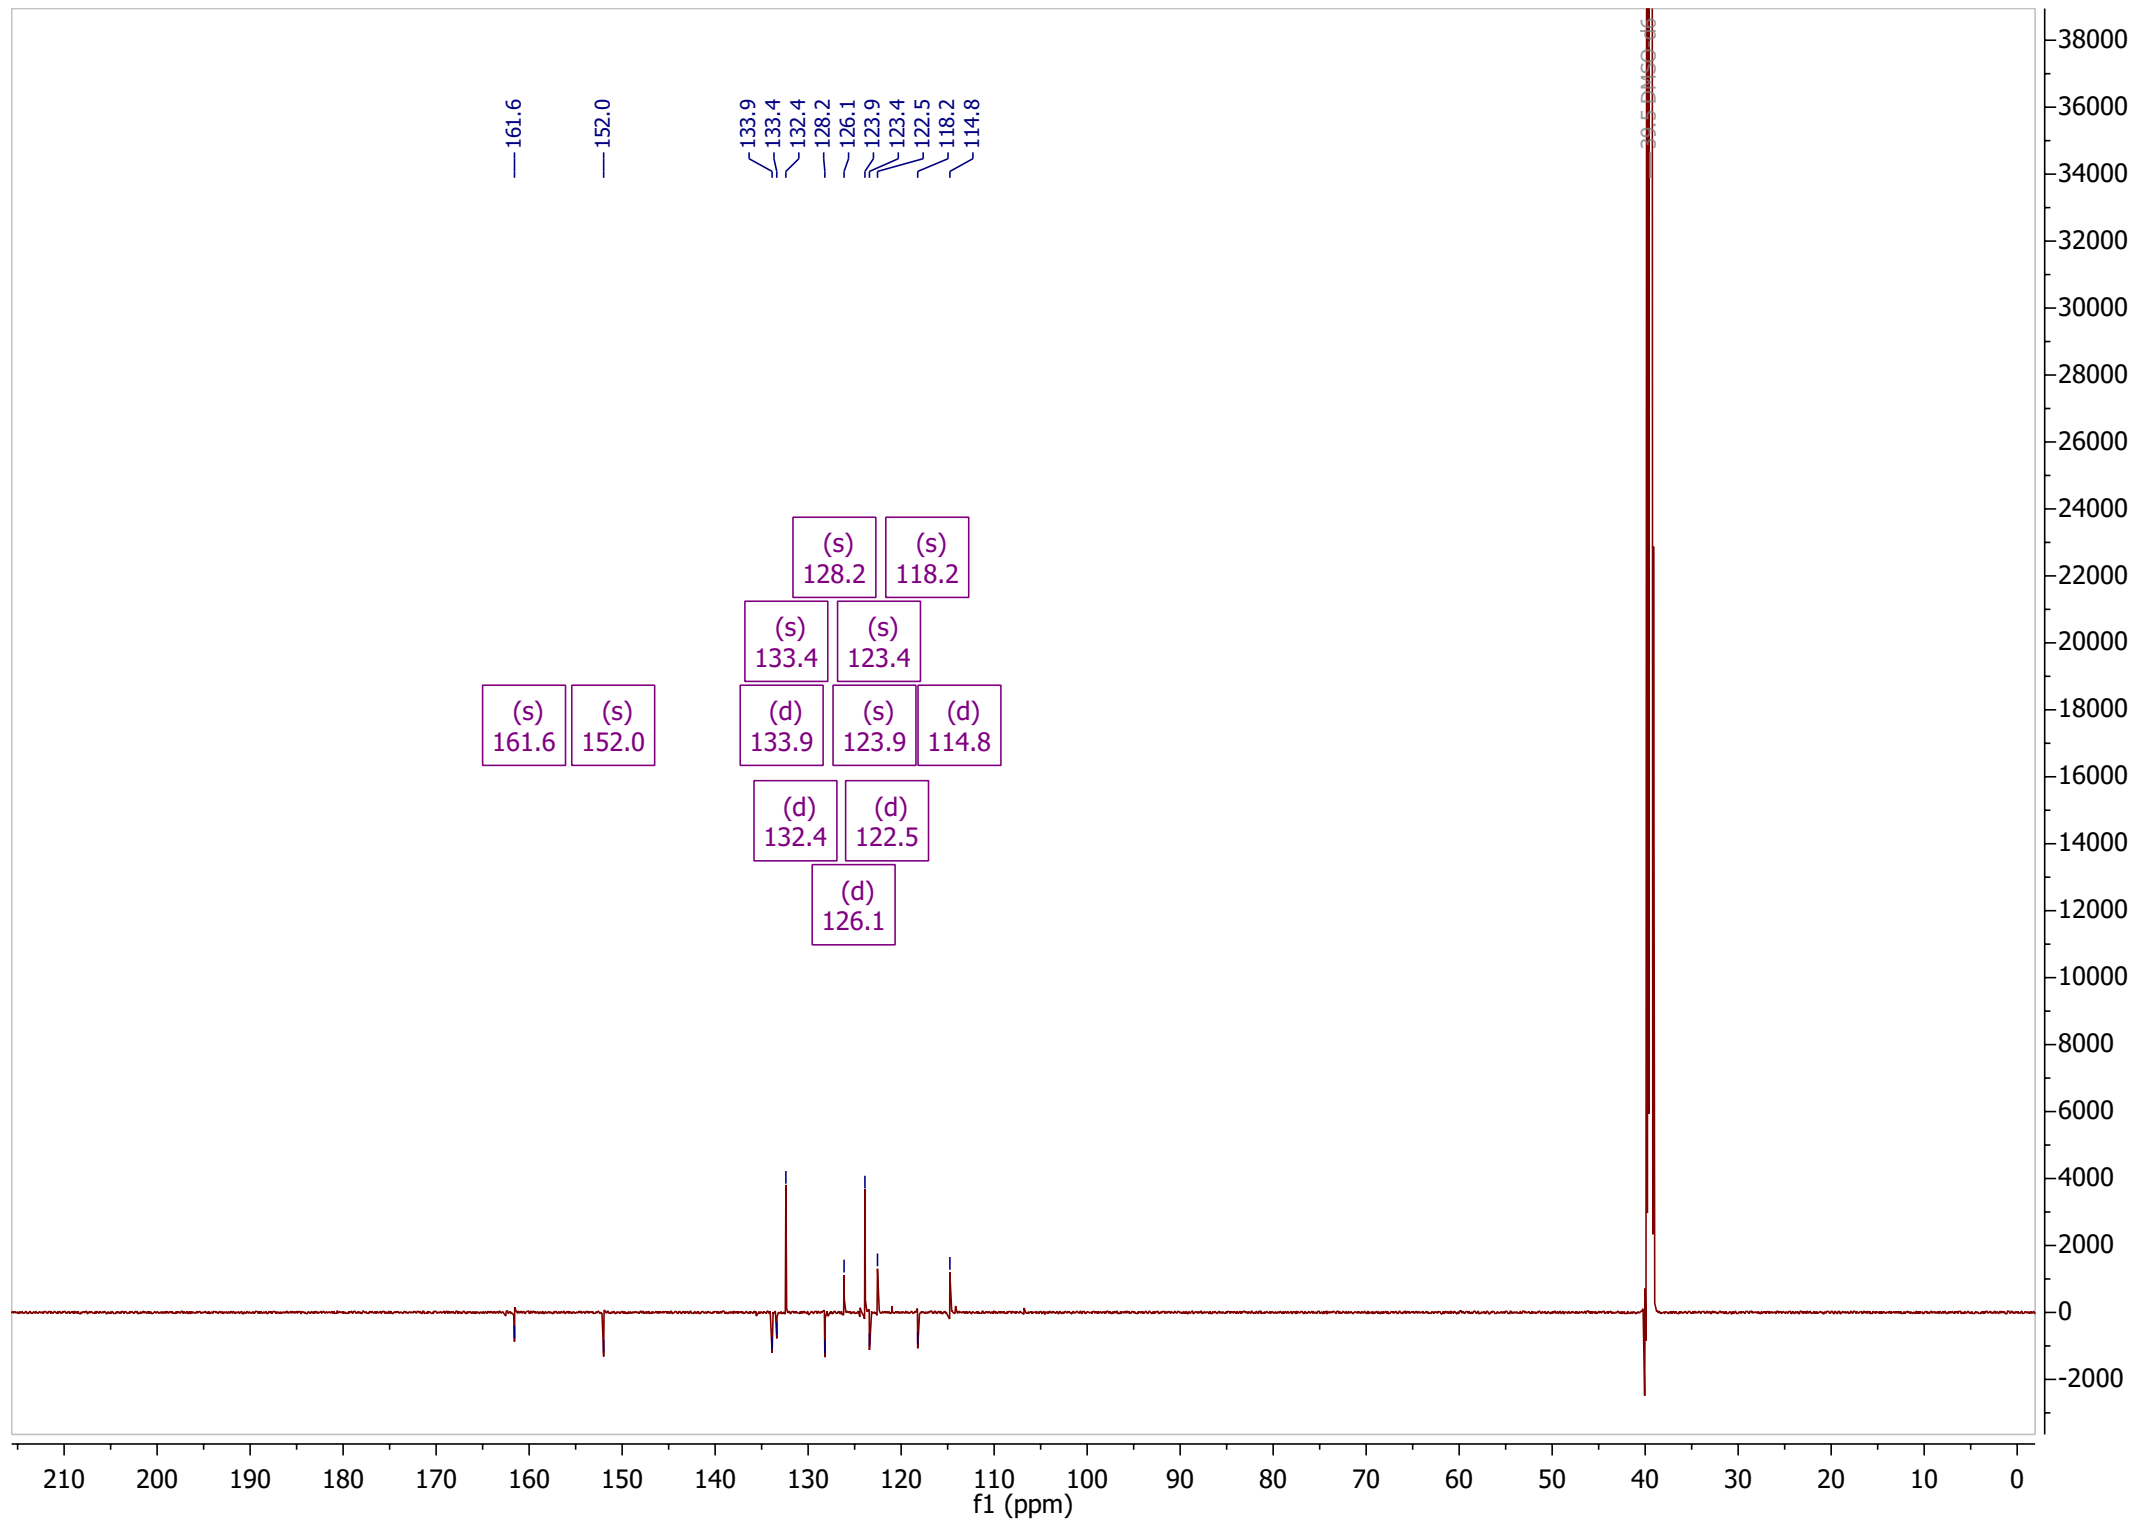

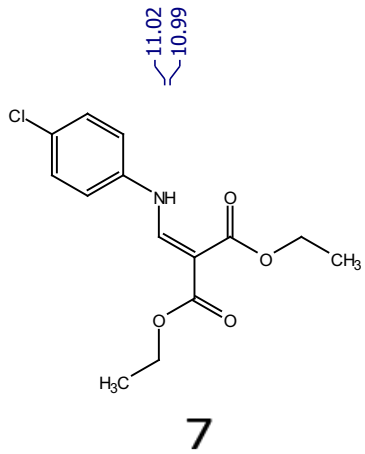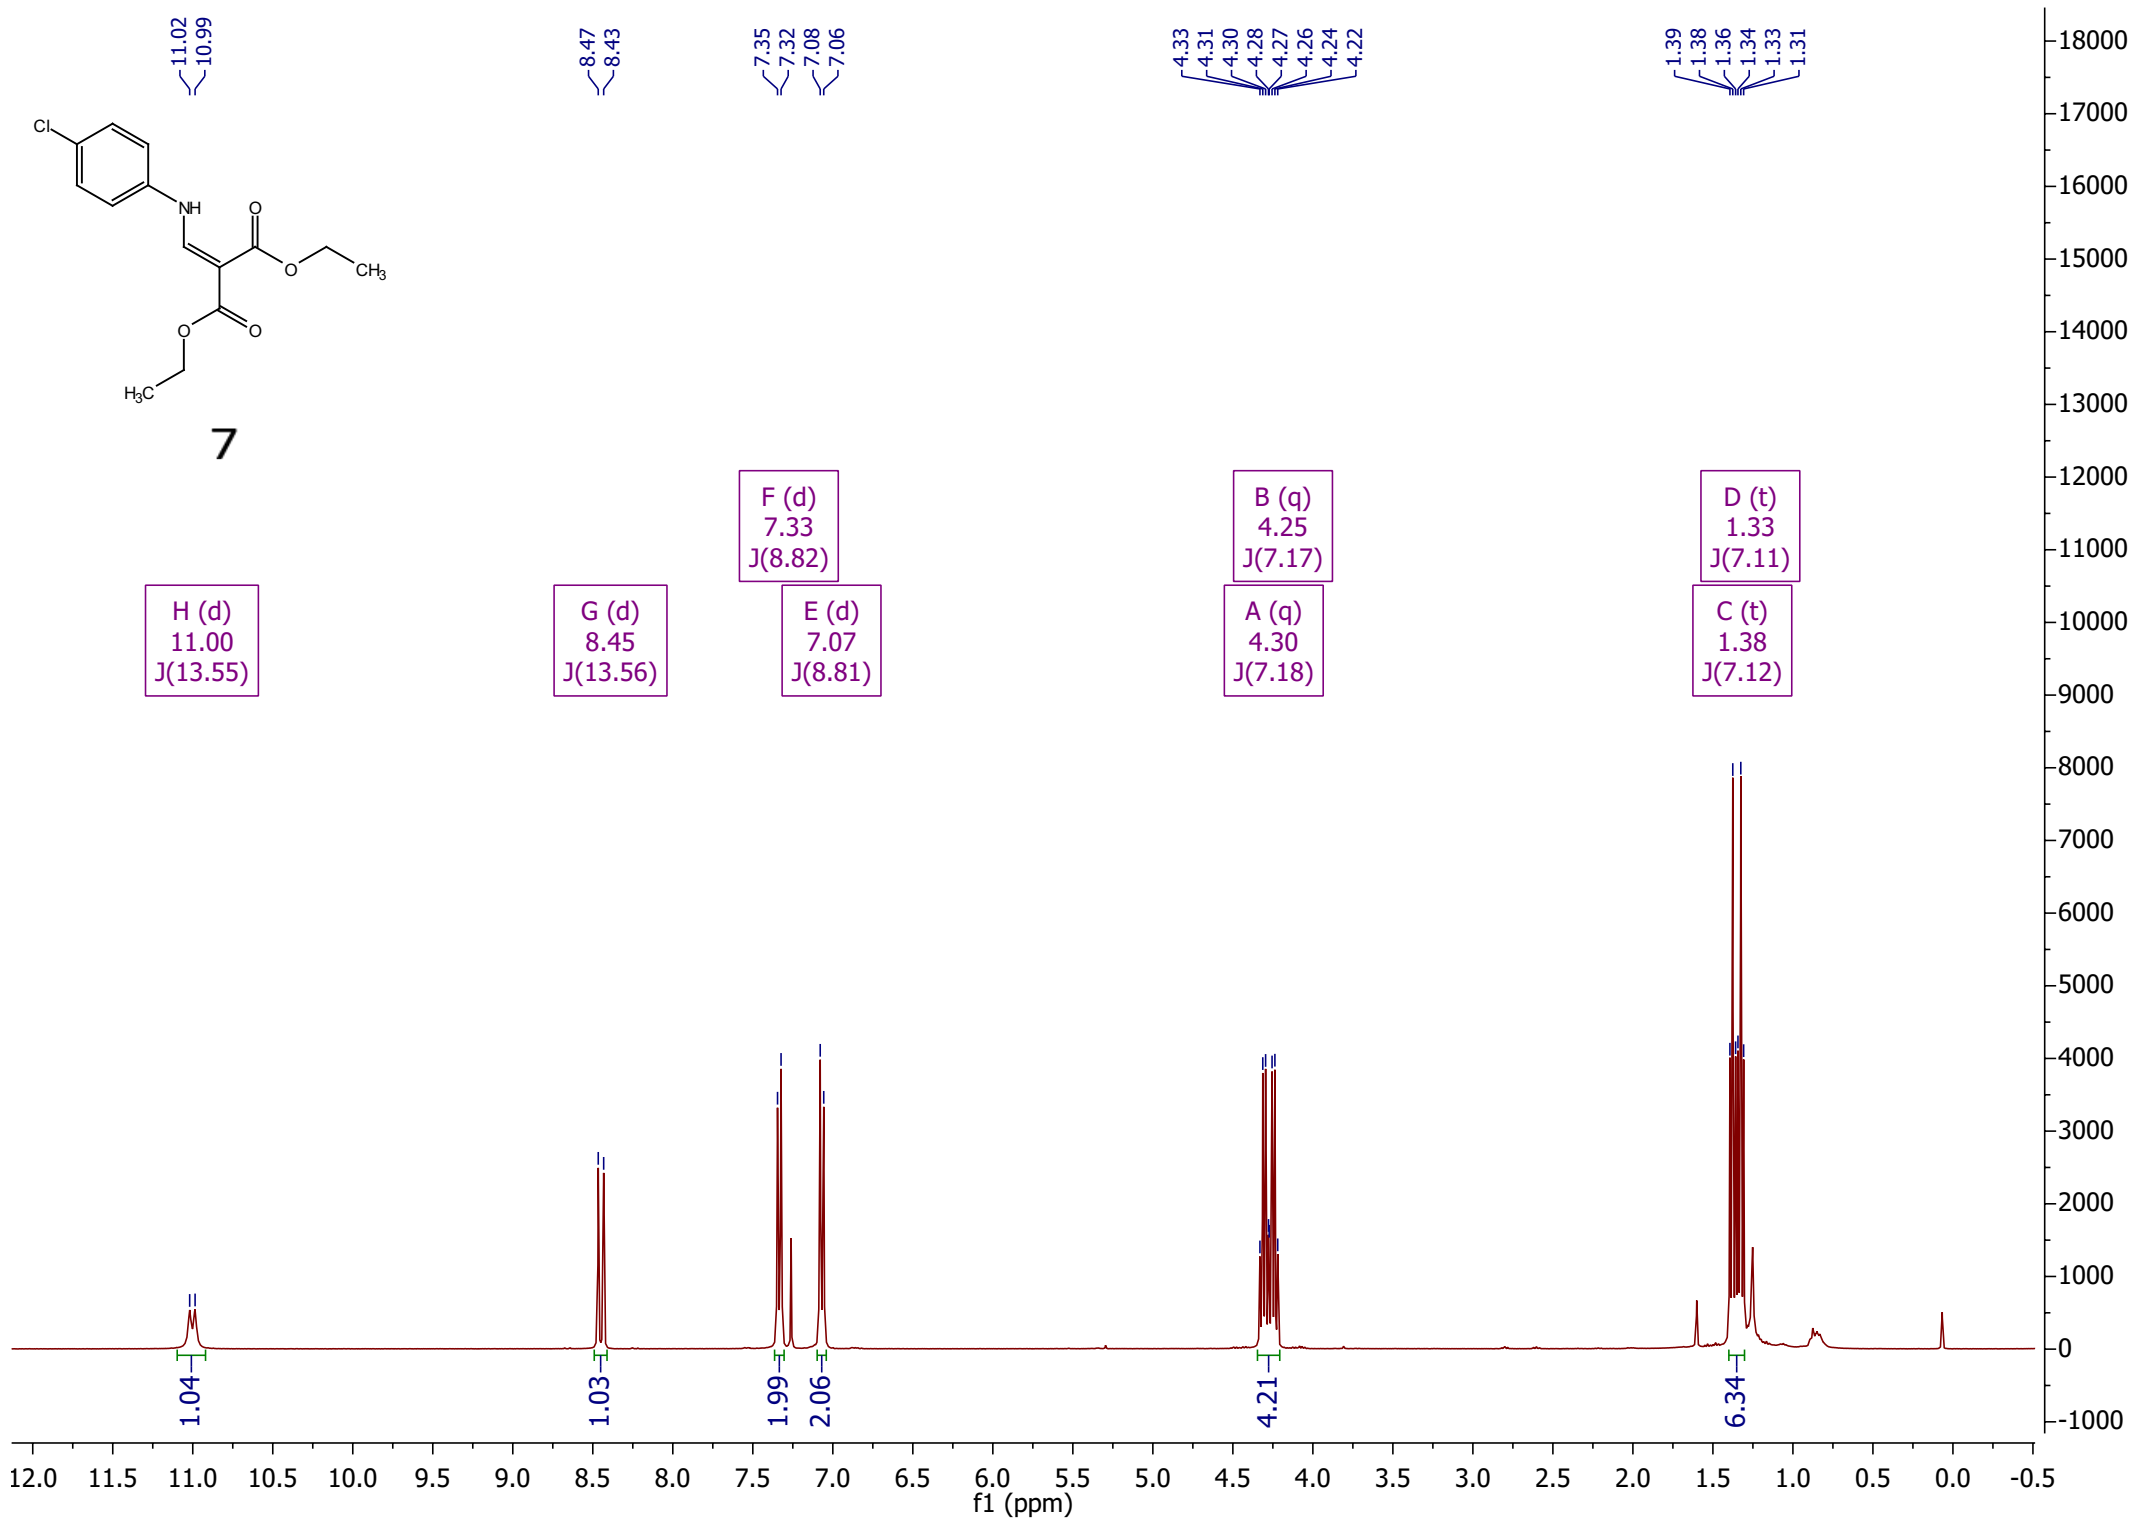

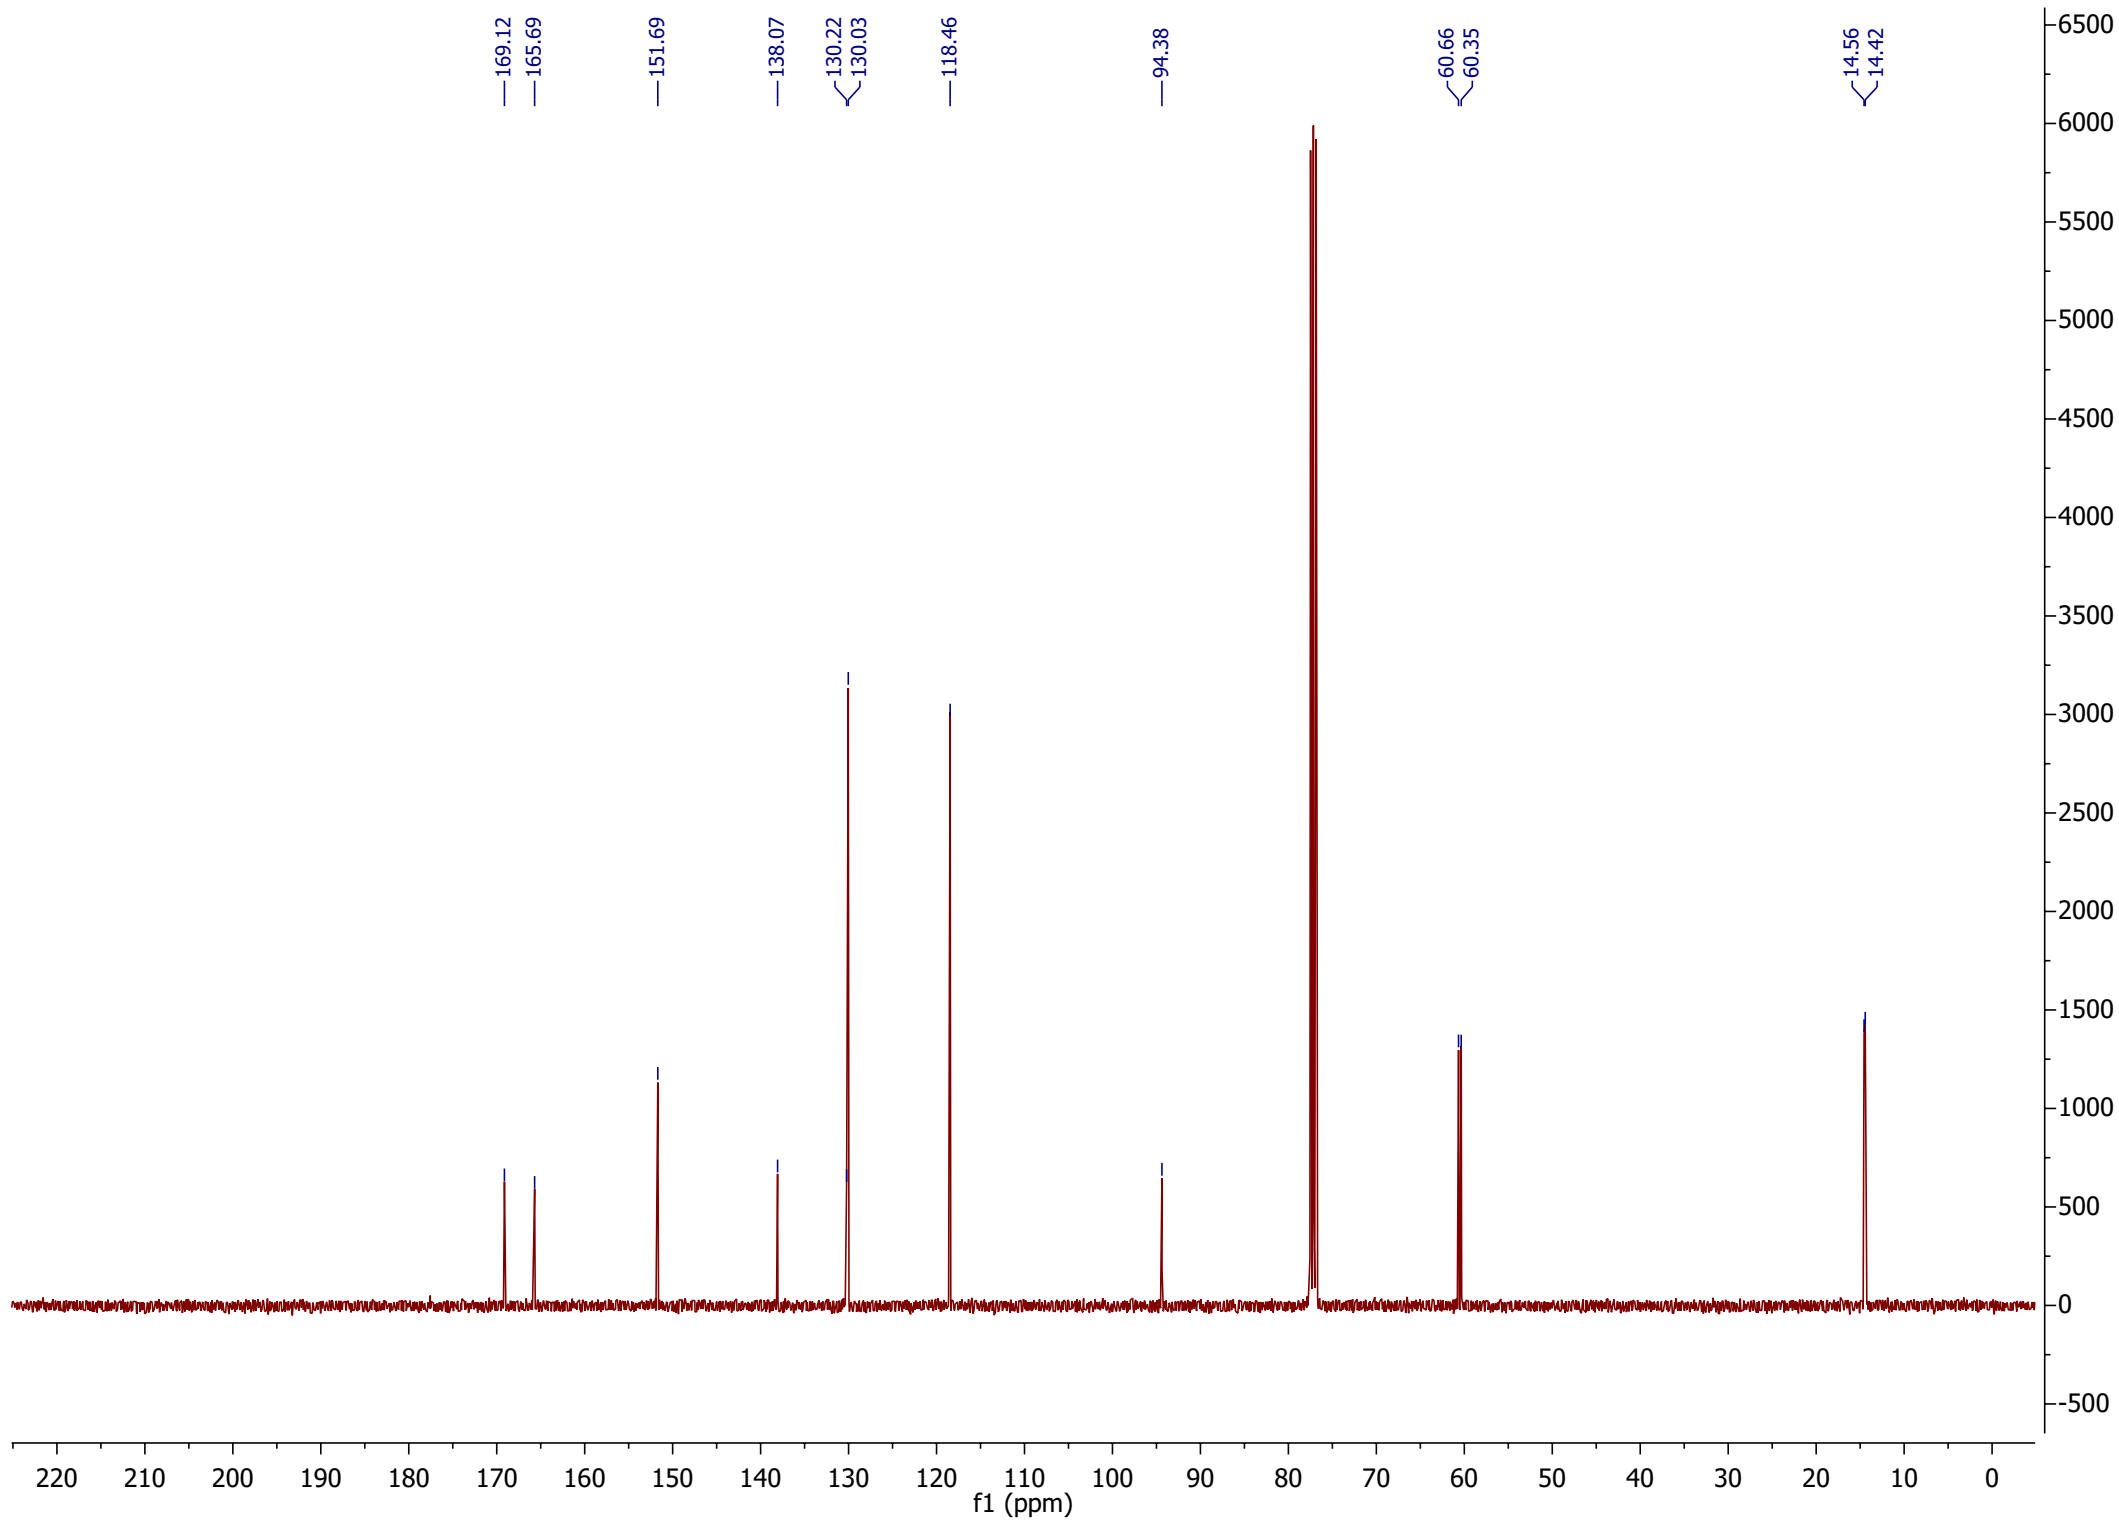

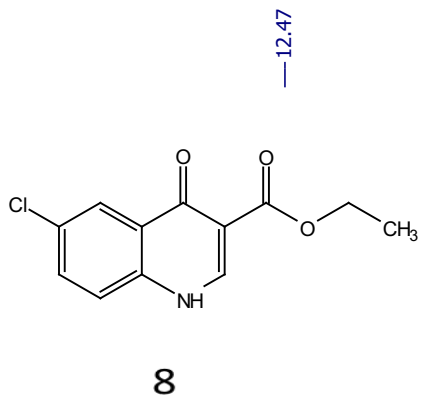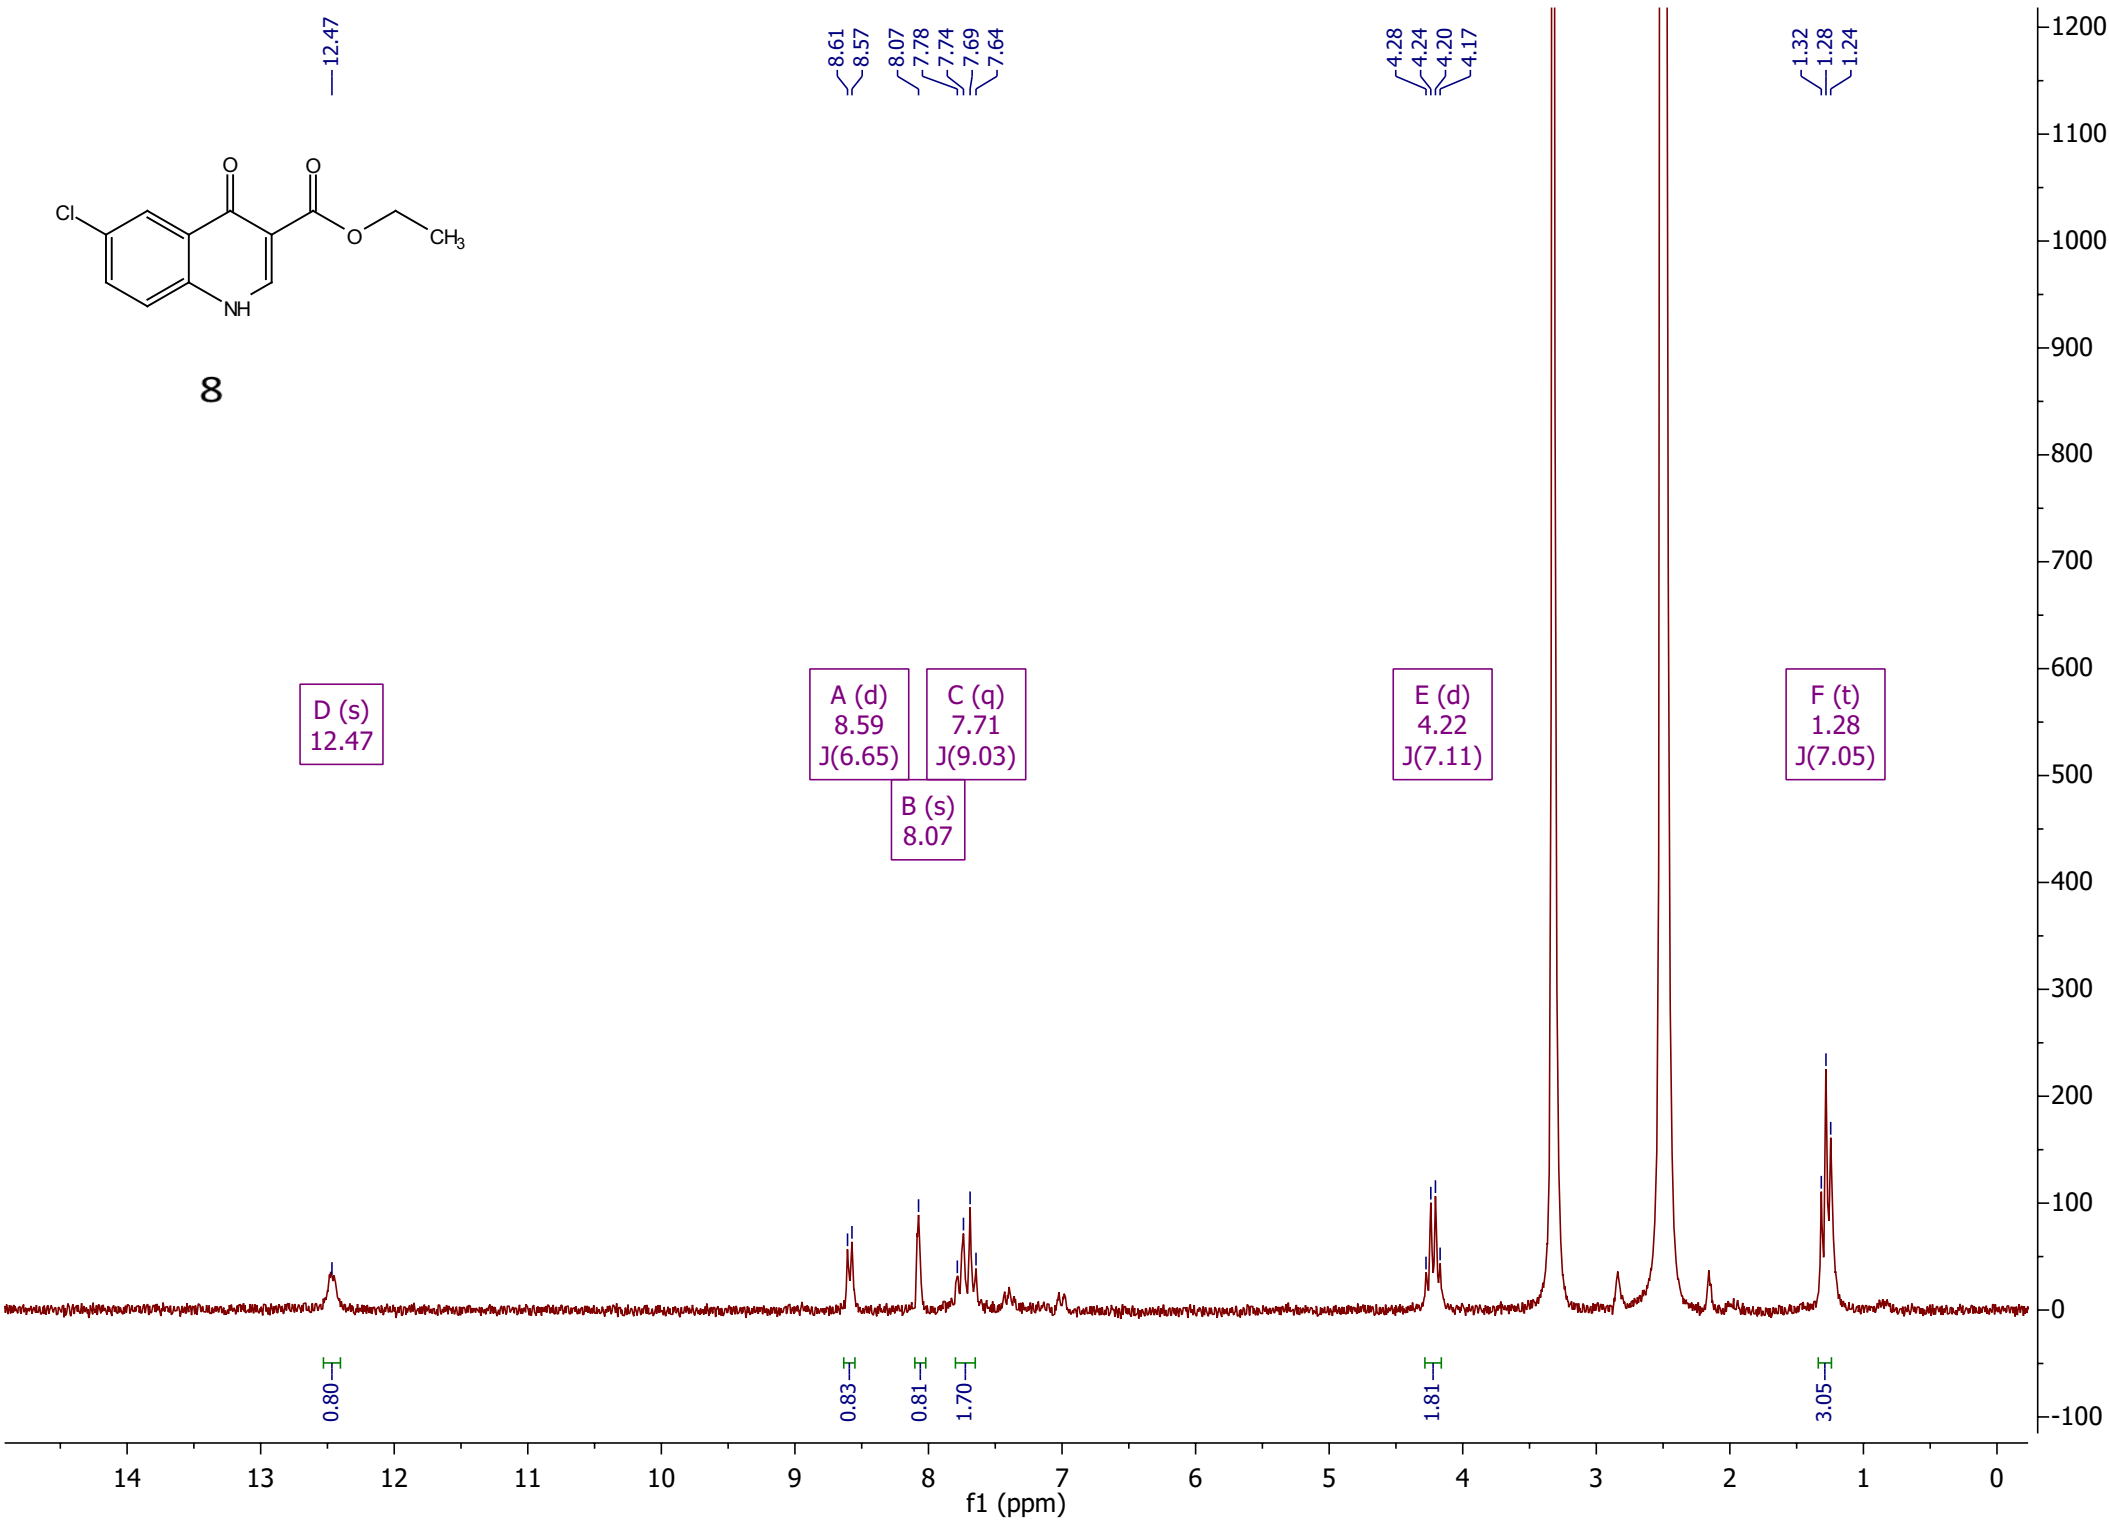

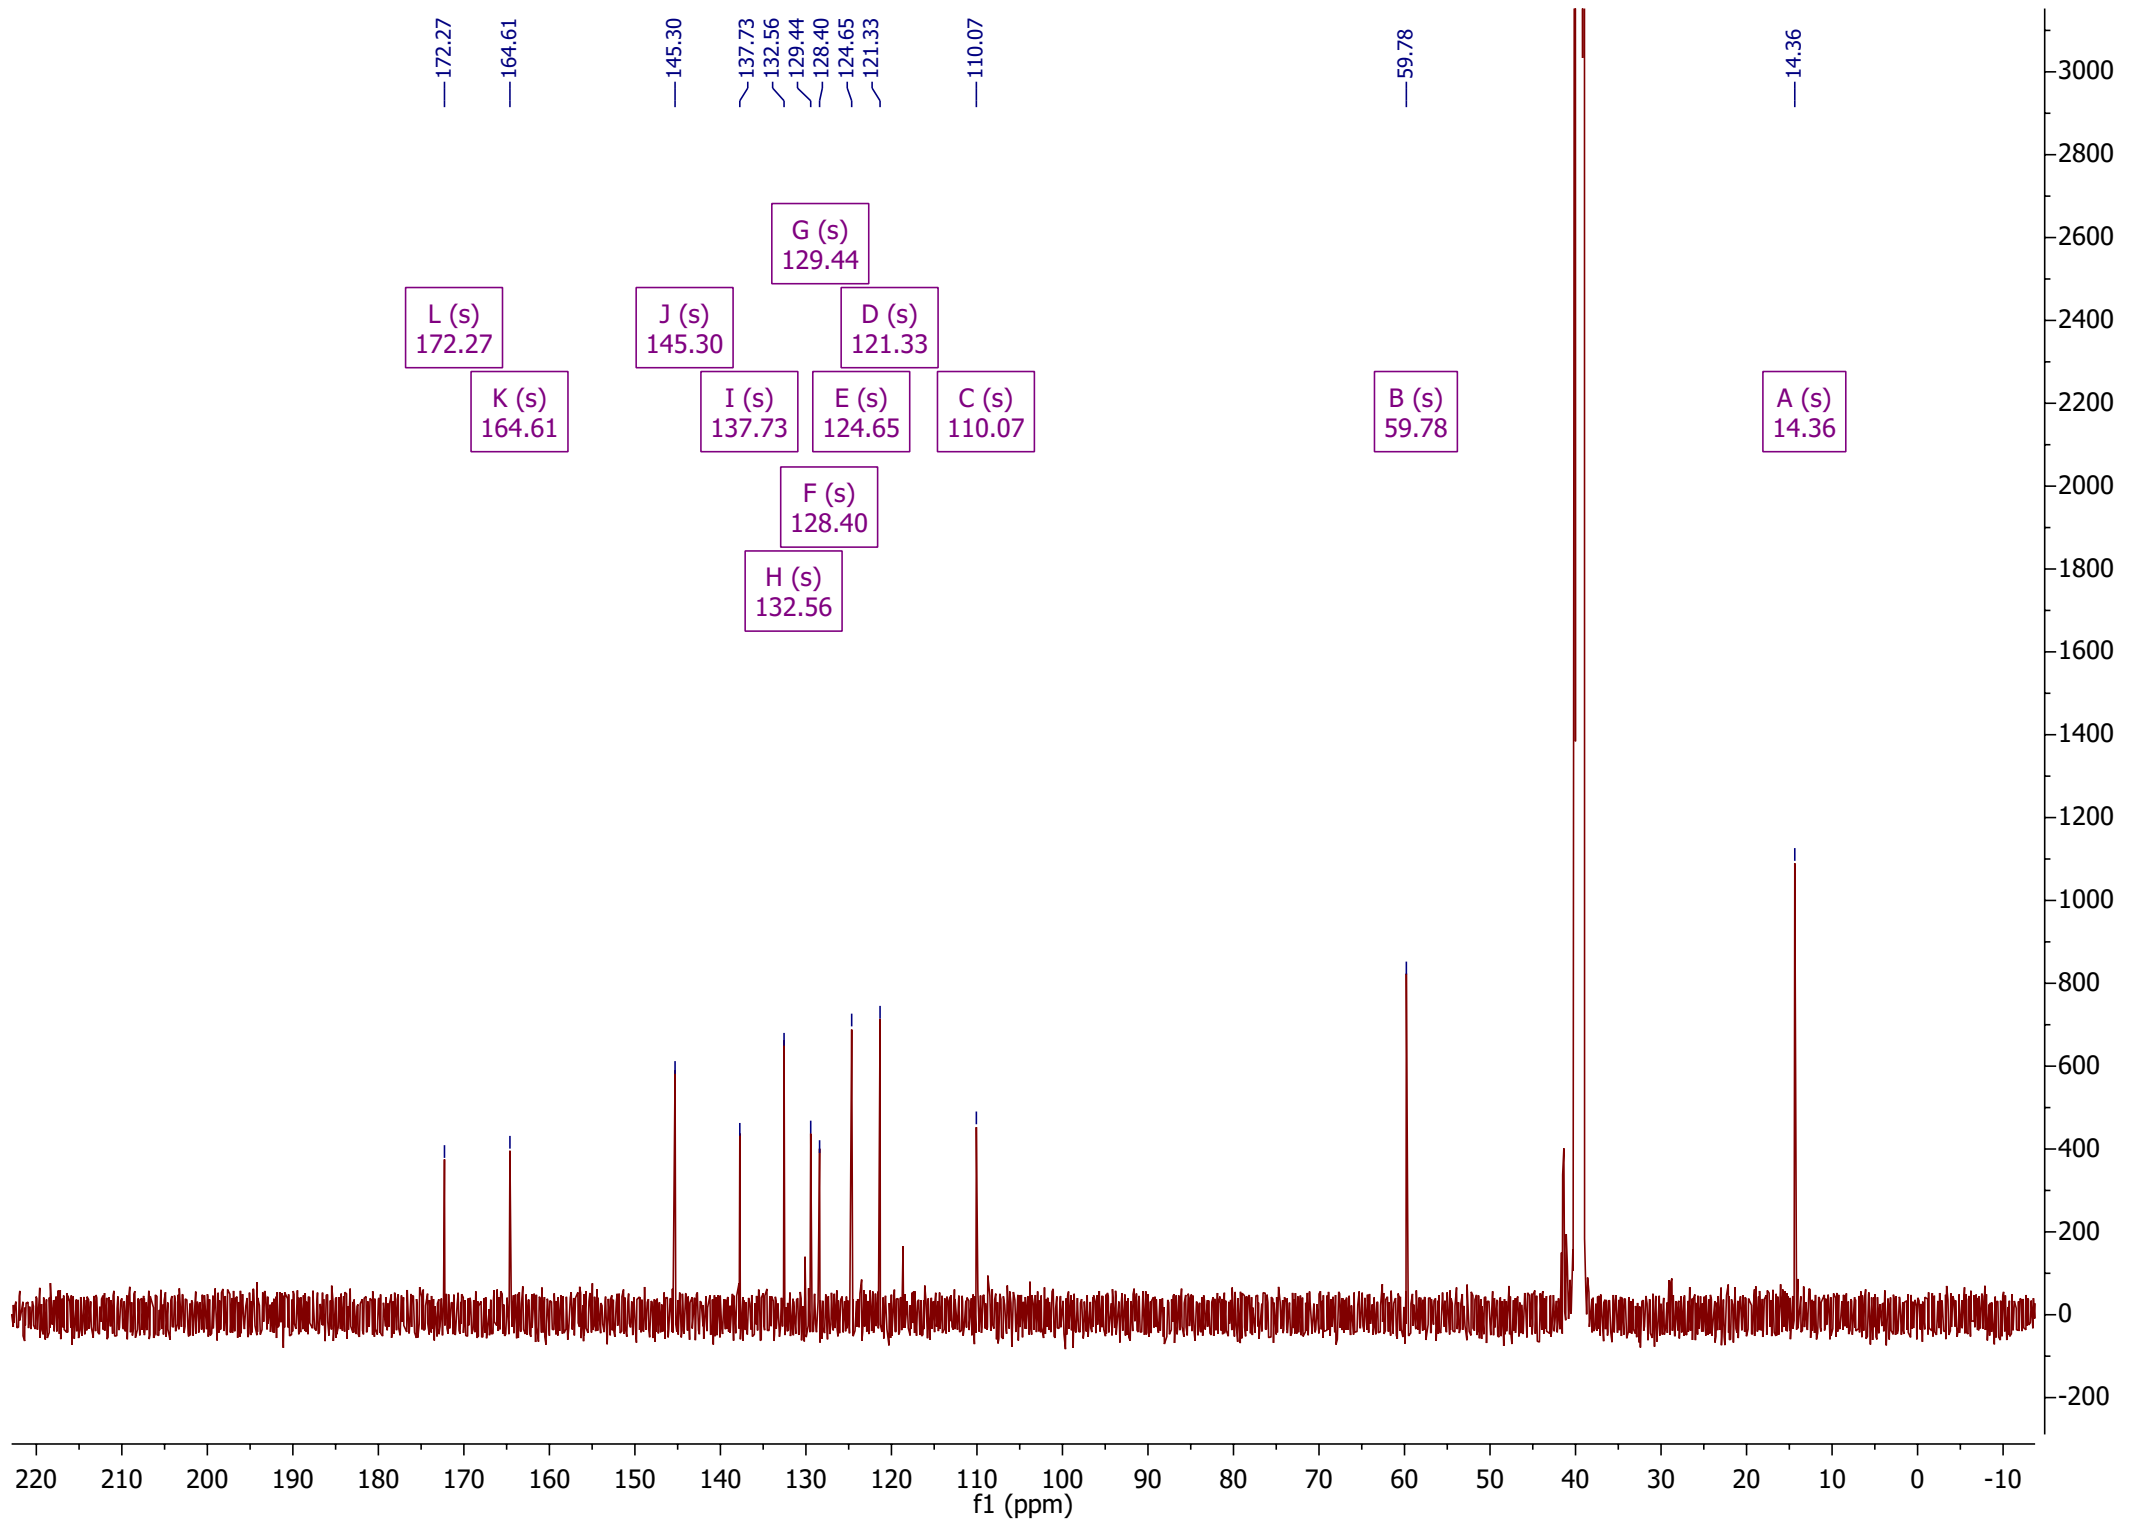

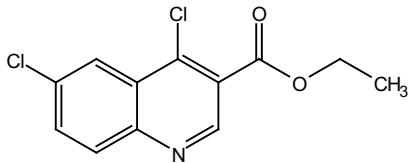

9

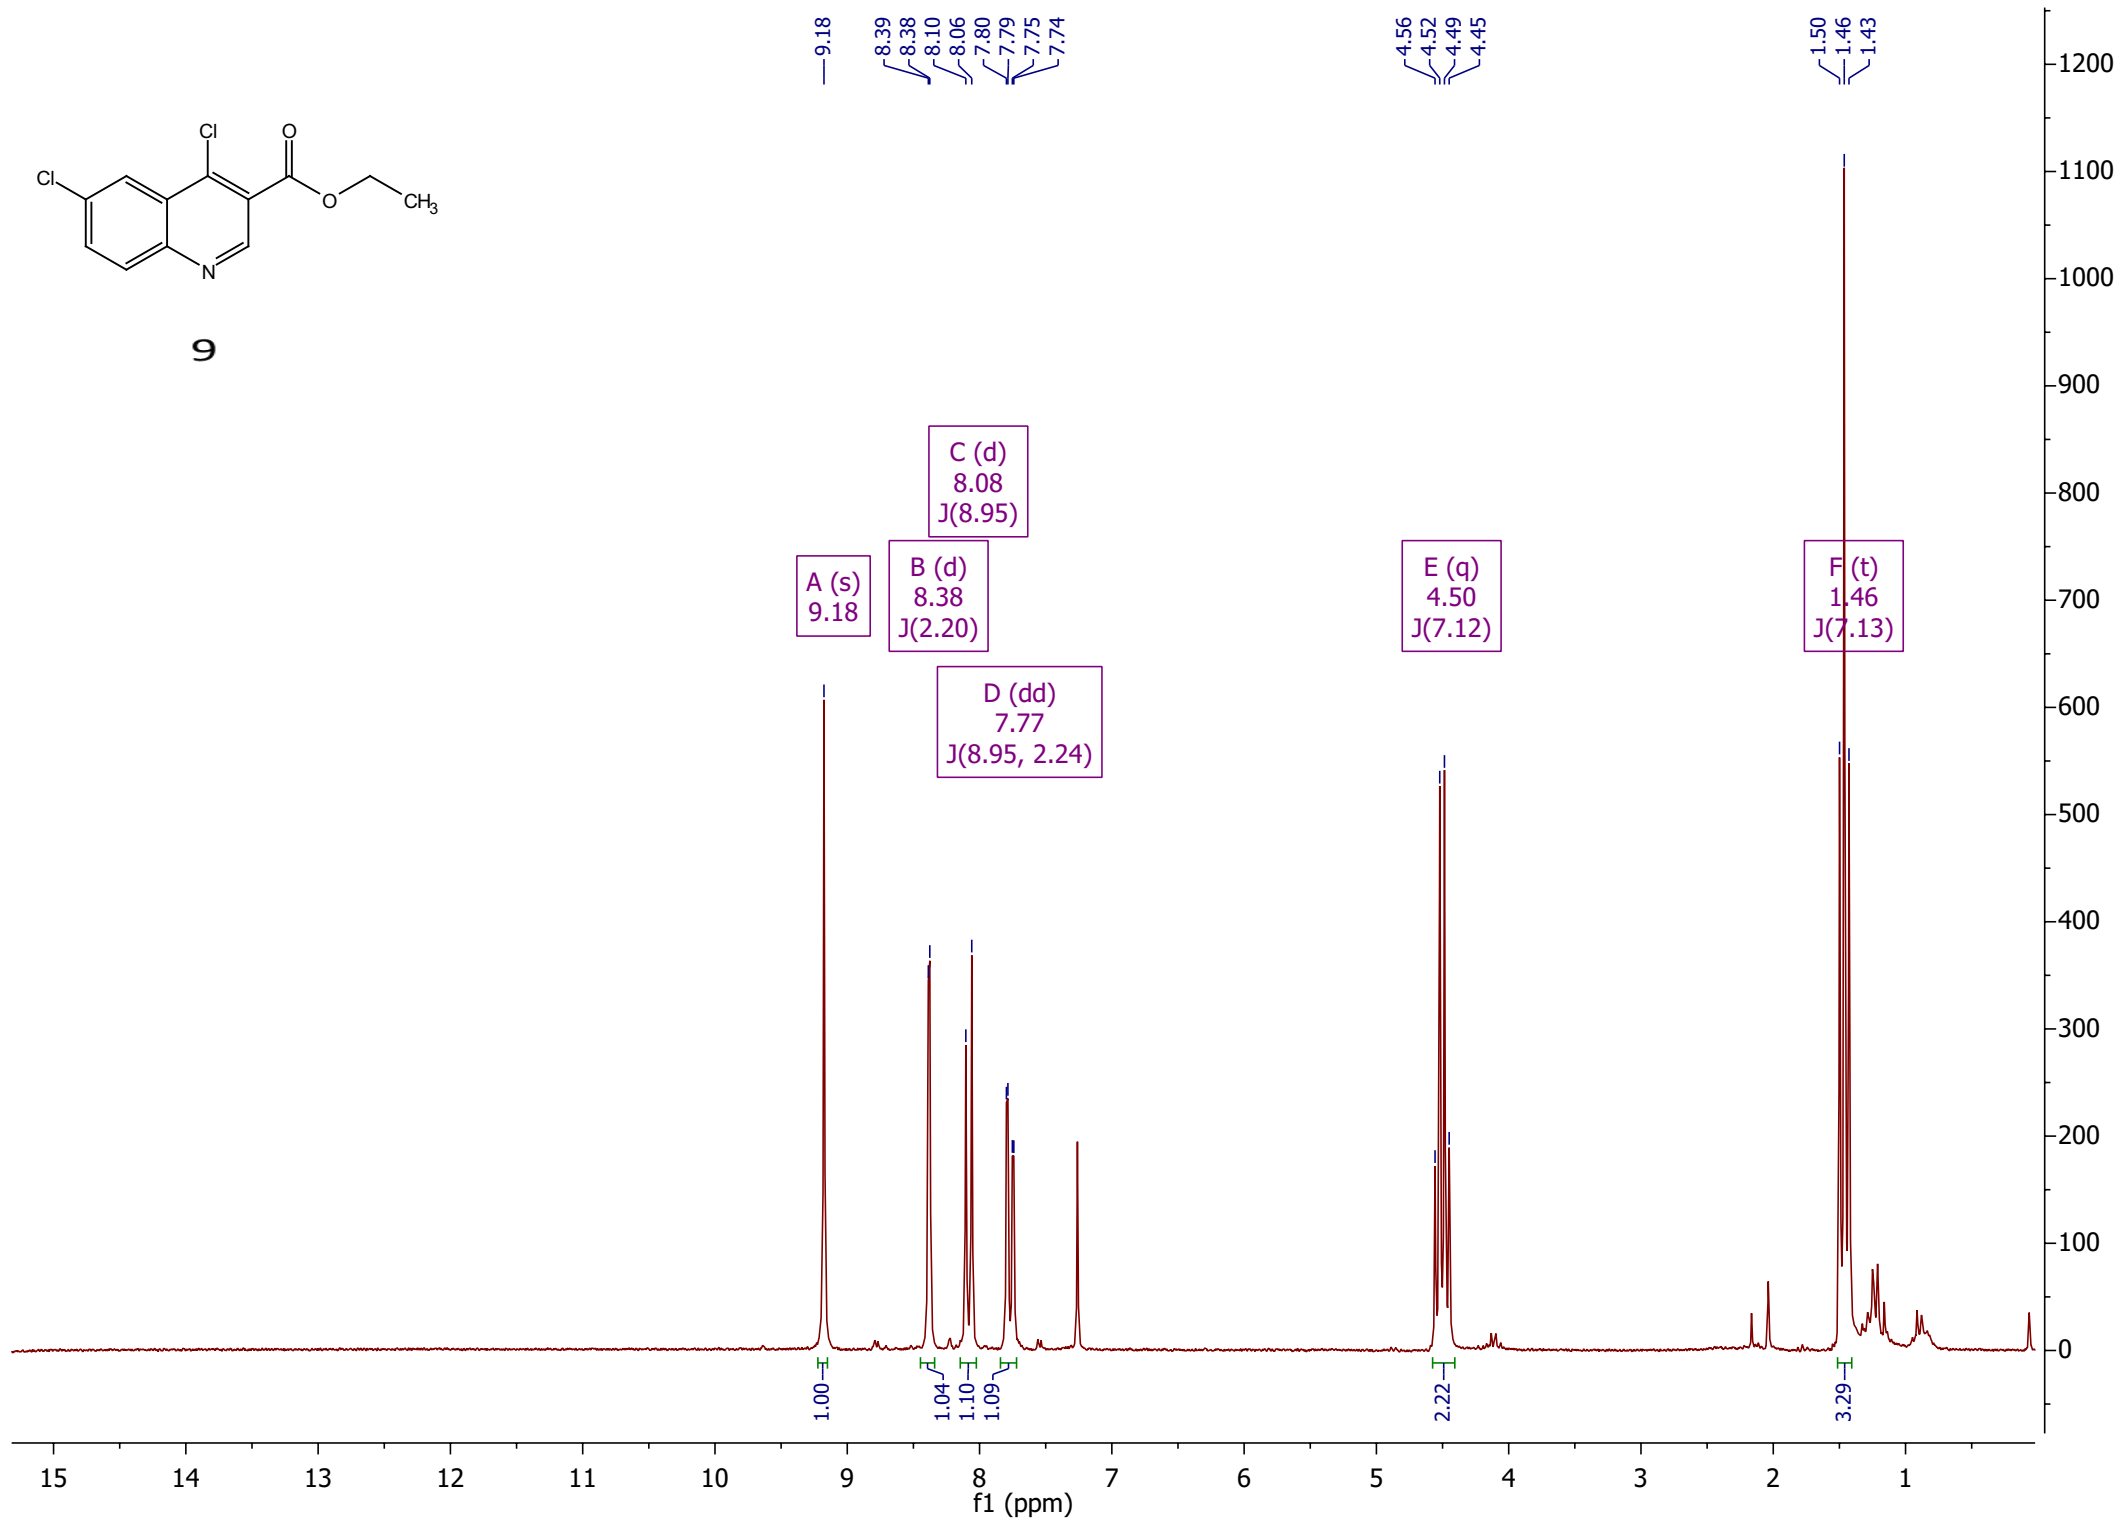

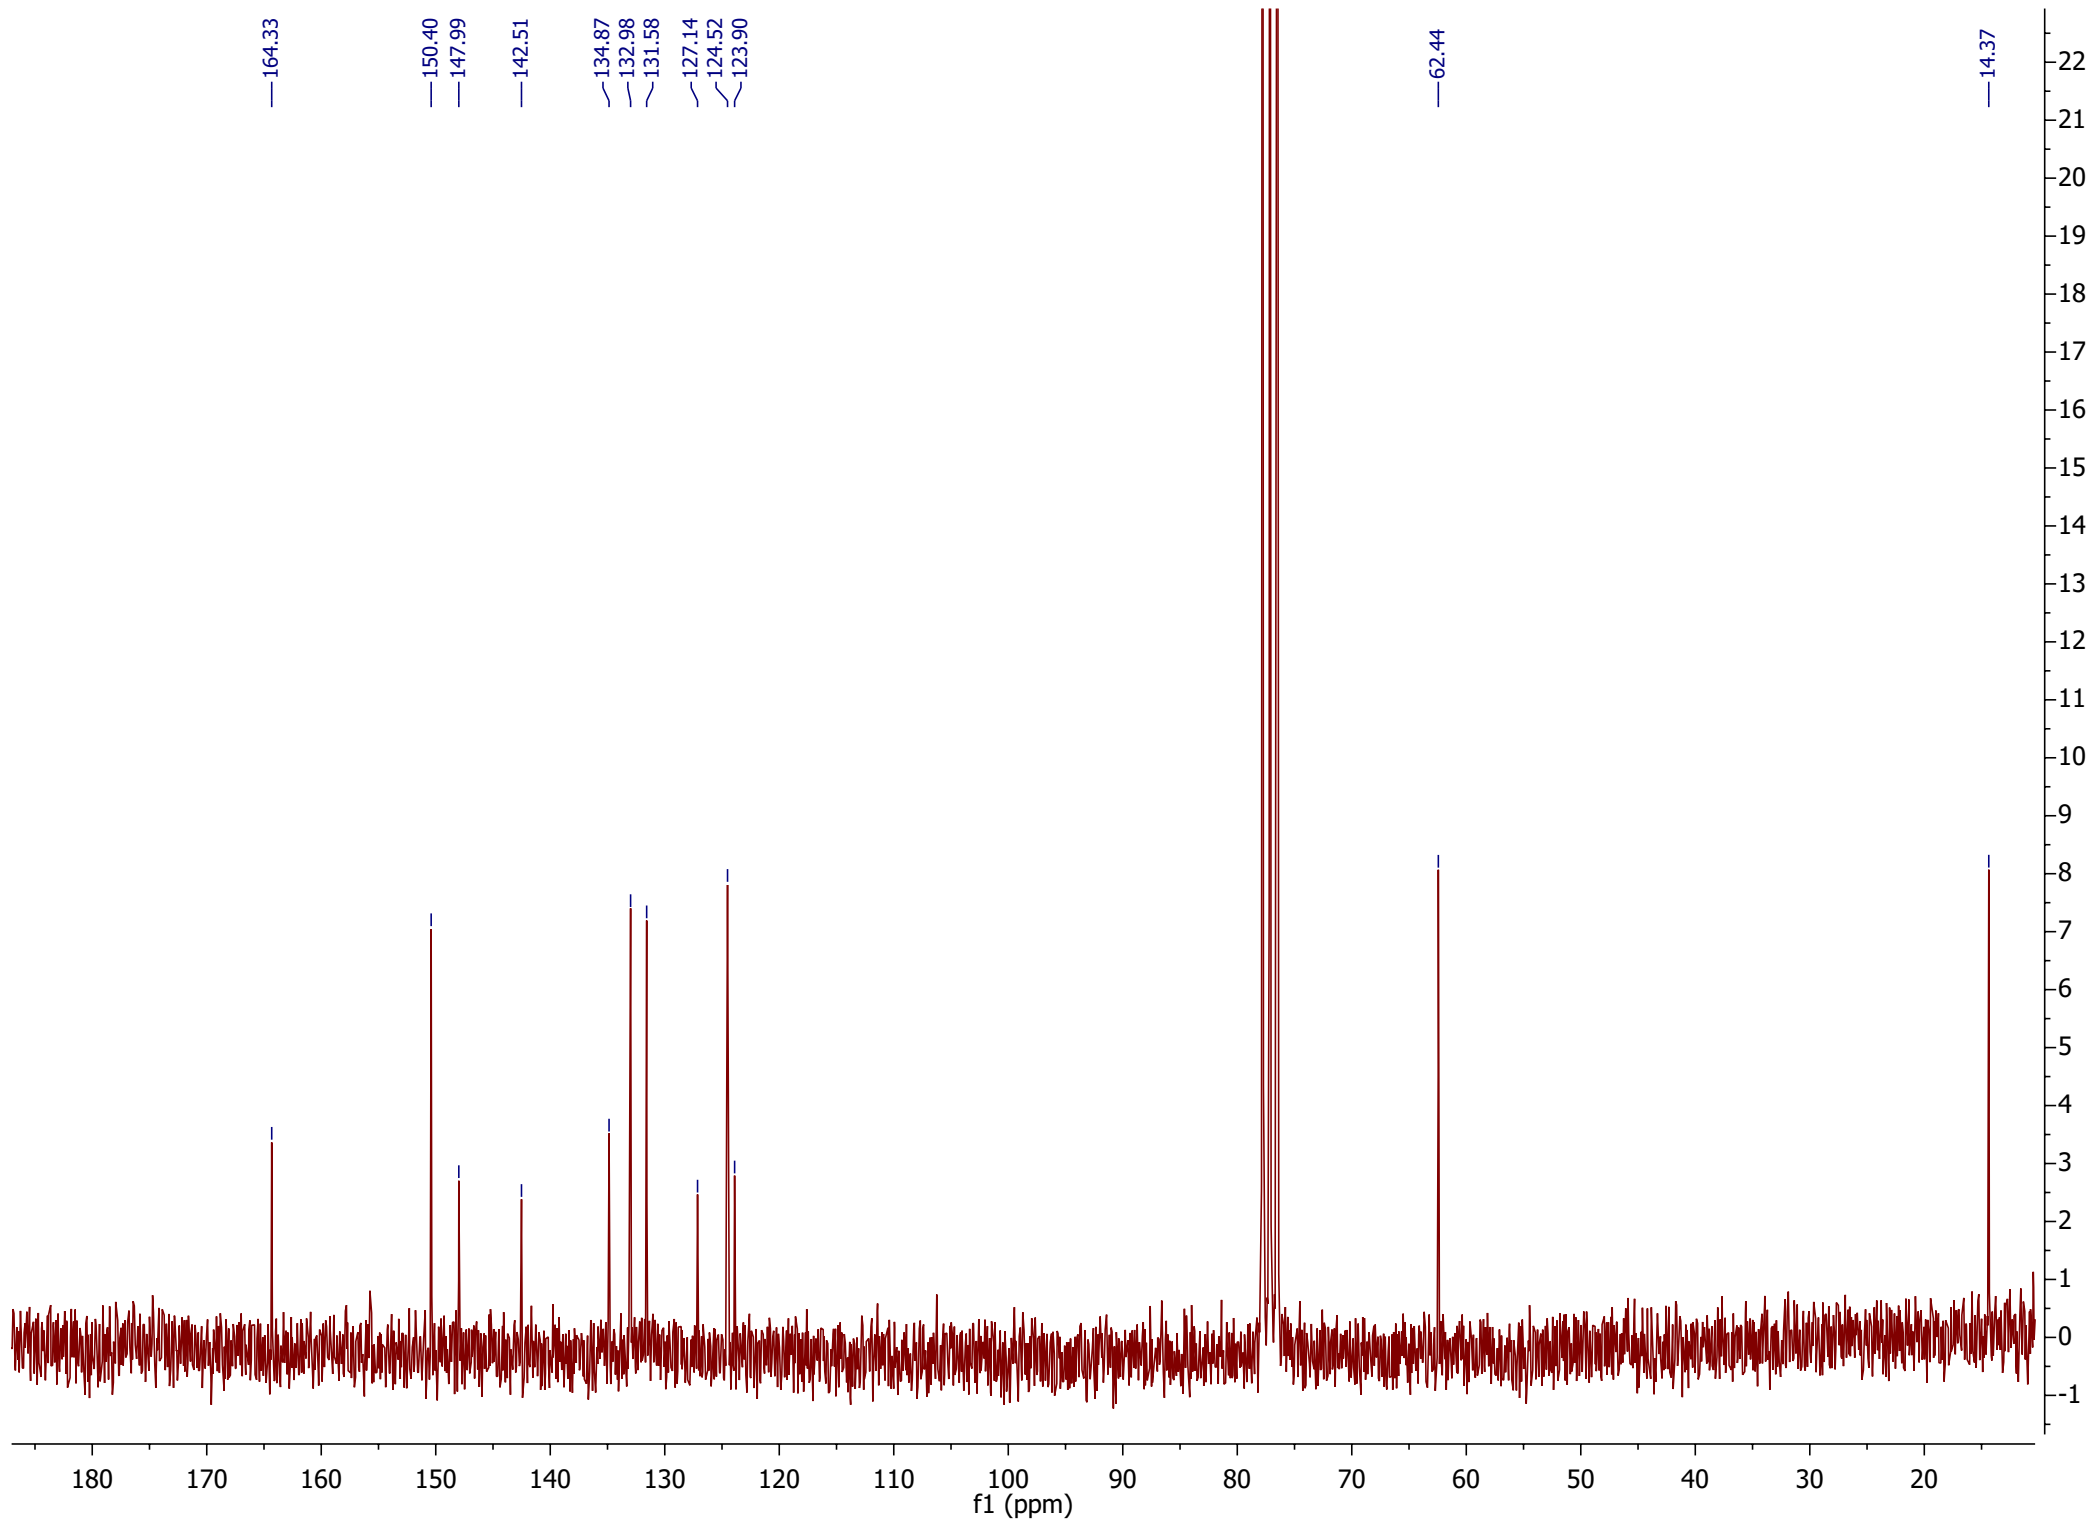

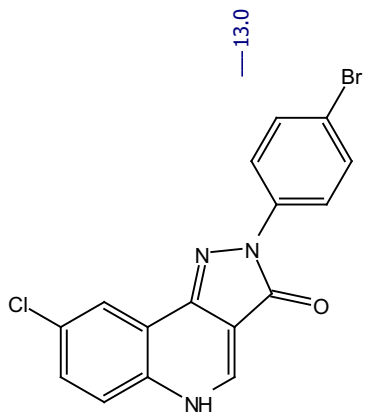

DCBS192

F (s)  
13.00

8.8  
8.8  
8.2  
8.2  
8.2  
8.2  
8.2  
8.2  
8.2  
8.2  
7.8  
7.7  
7.7  
7.7  
7.7  
7.7  
7.6  
7.6  
7.6  
7.6

C (dd)  
8.17  
J(1.76, 1.08)

A (d)  
8.80  
J(5.50)

D (m)  
7.74

B (m)  
8.21

E (m)  
7.63

0.94

1.00

2.08

0.97

2.14

2.05

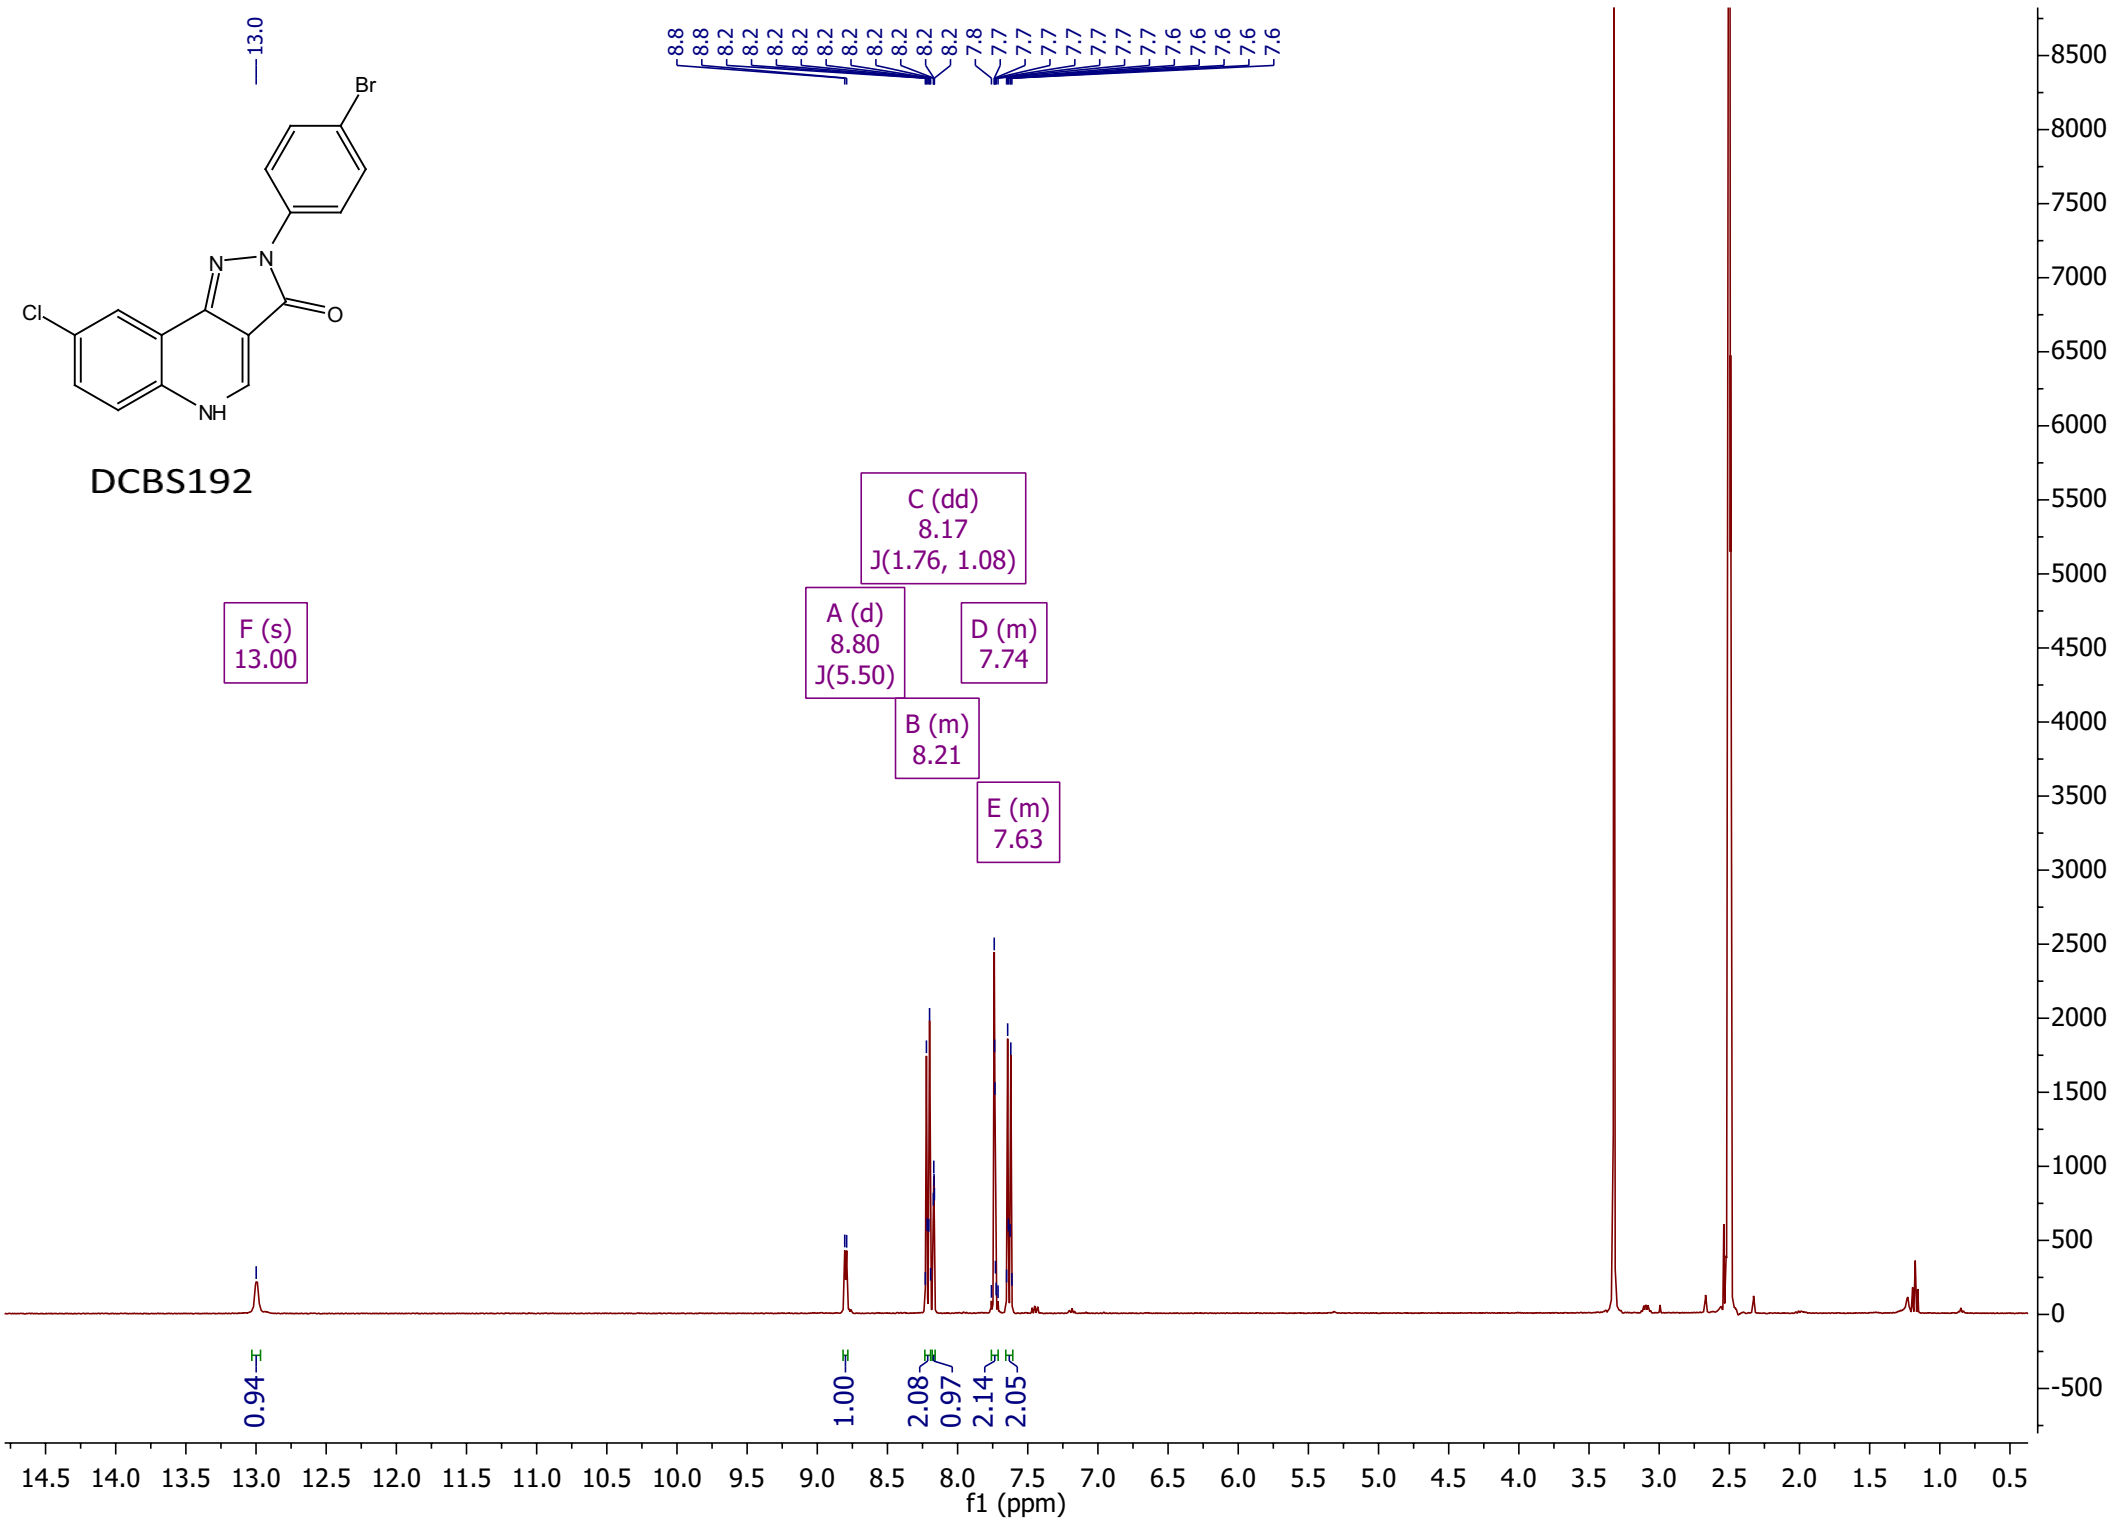



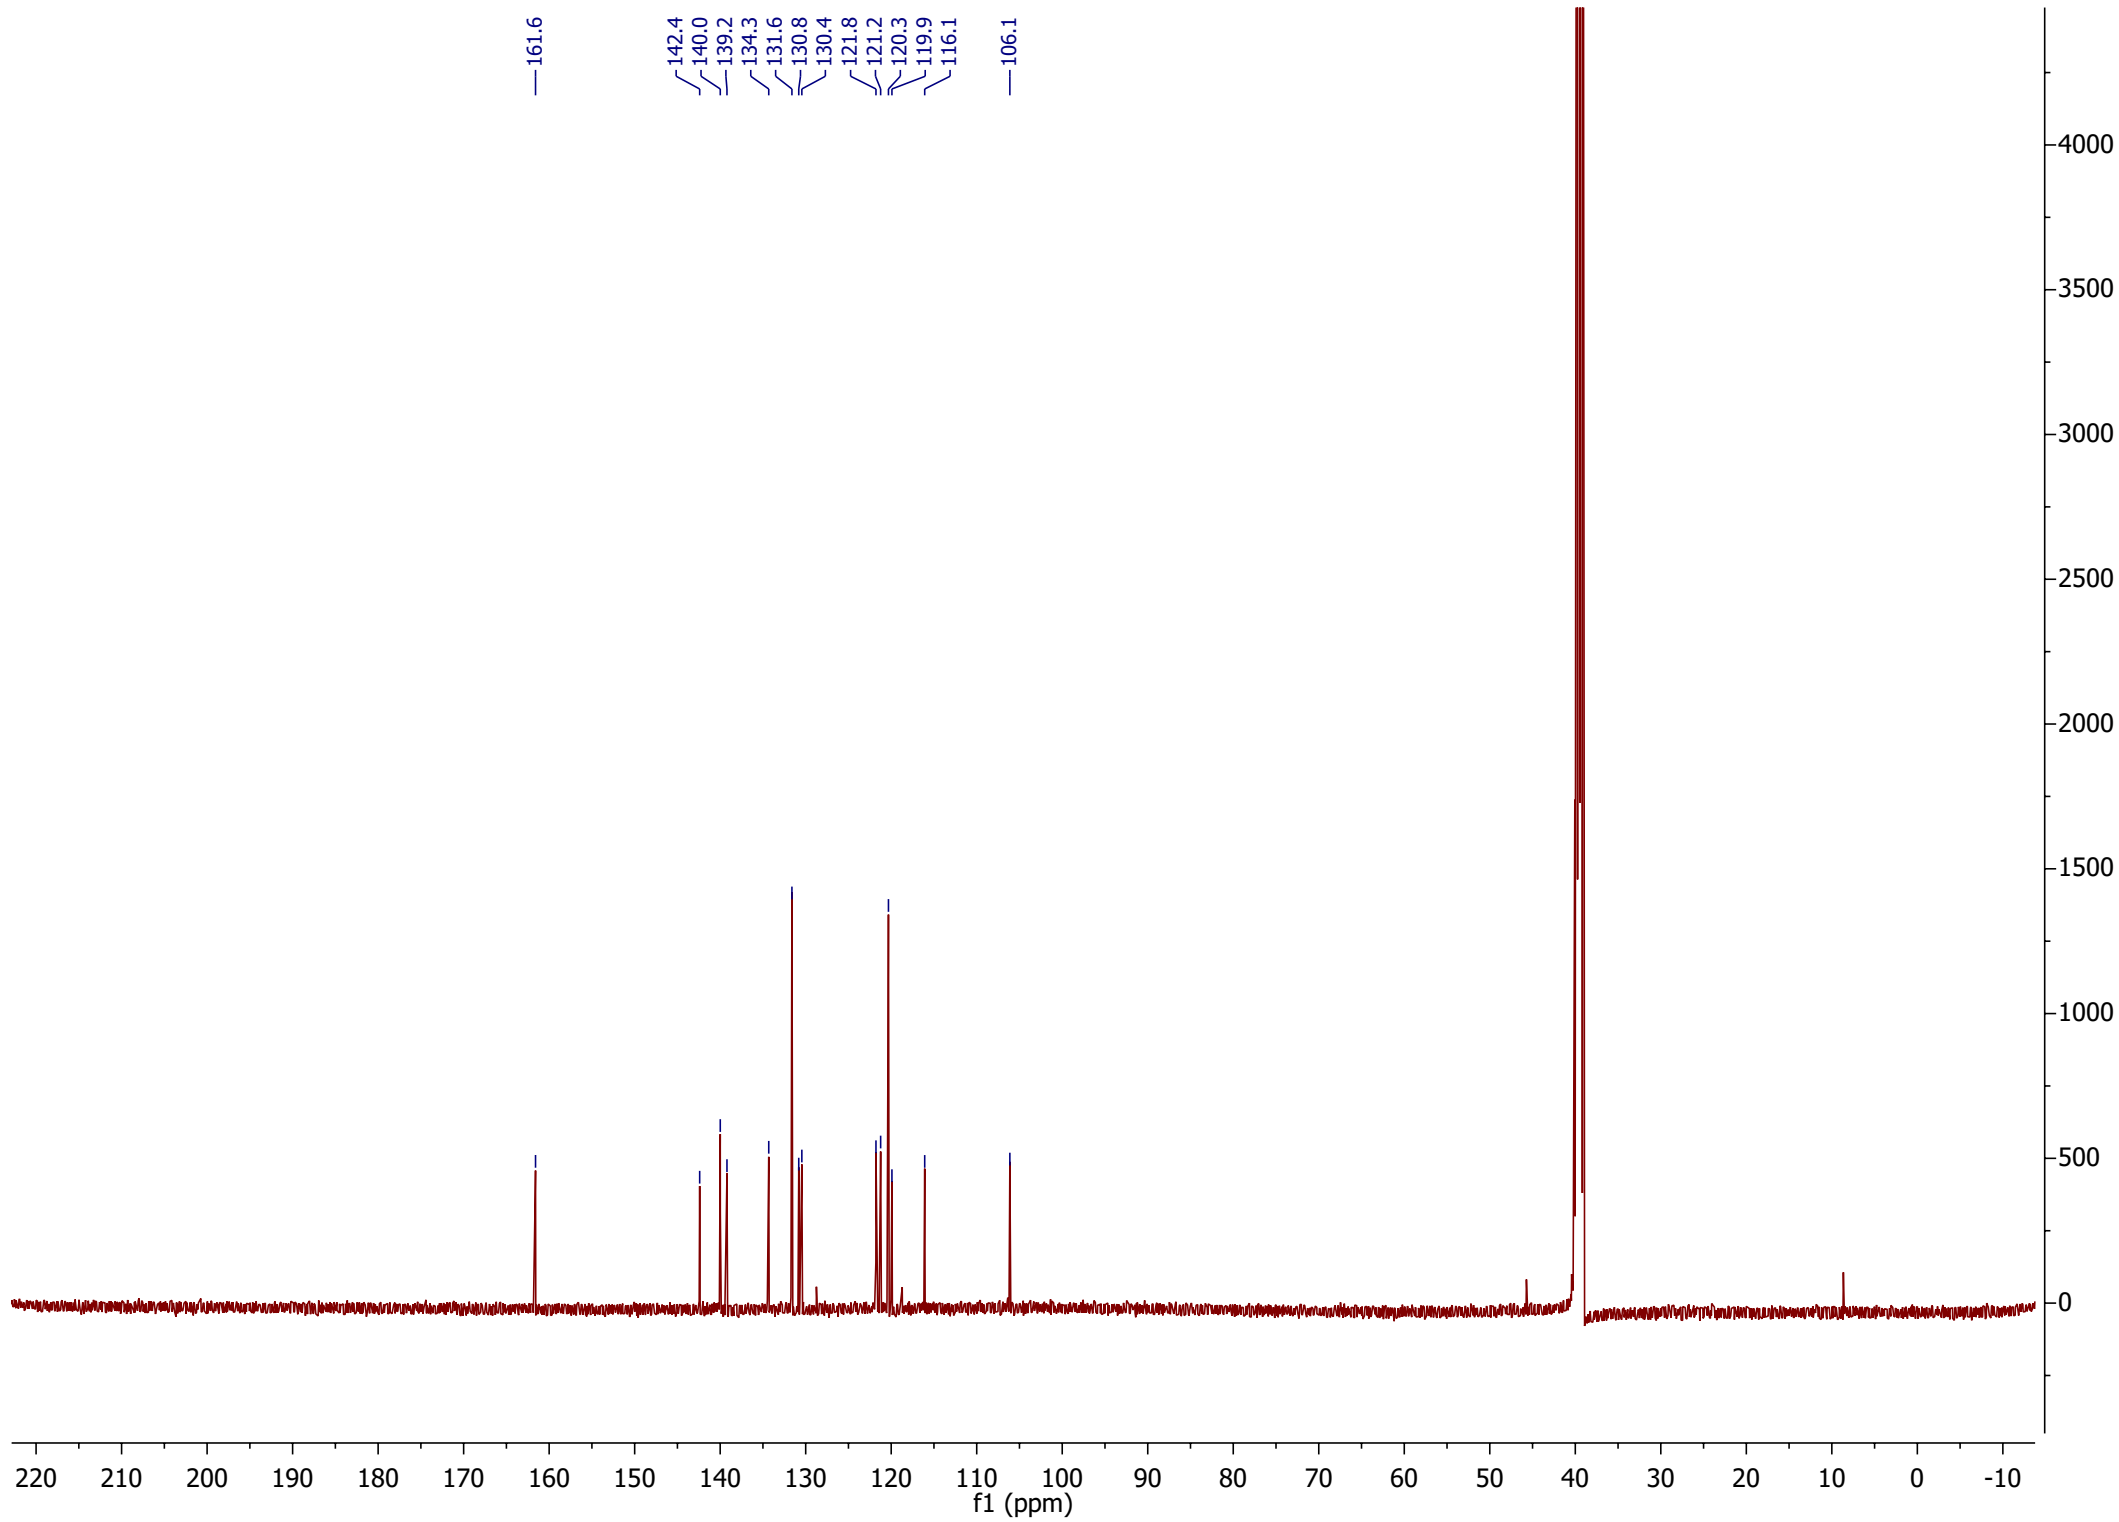

Supplement: ijms-21-00334-s001.pdf [file ijms-21-00334-s001.pdf]
